# Supplementary material for: Comprehensive RNA-Seq Analysis on the Regulation of Tomato Ripening by Exogenous Auxin
Source: PLoS One. 2016 May 26;11(5):e0156453. doi: 10.1371/journal.pone.0156453 (PMC4881990; doi:10.1371/journal.pone.0156453)
Supplement: S6 Table — (XLSX) [file pone.0156453.s008.xlsx]

## Sheet: Sheet1
S6 Table. GO enrichment analysis of DEGs in comparison group AX7d vs. CK7d.
GO accession	Description	Term type	P-Value	Q-Value	Numbers of DEGs
GO:0044237	cellular metabolic process	biological_process	2.9289e-09	9.0019e-06	2658
GO:1901564	organonitrogen compound metabolic process	biological_process	4.4908e-09	9.0019e-06	538
GO:0048037	cofactor binding	molecular_function	3.1258e-08	4.1771e-05	301
GO:0009058	biosynthetic process	biological_process	9.0559e-08	9.0763e-05	1559
GO:1901576	organic substance biosynthetic process	biological_process	2.6608e-07	0.00020559	1467
GO:0032991	macromolecular complex	cellular_component	3.0769e-07	0.00020559	843
GO:0044249	cellular biosynthetic process	biological_process	1.2345e-06	0.00070699	1420
GO:0044281	small molecule metabolic process	biological_process	2.5481e-06	0.0010911	488
GO:0015159	polysaccharide transmembrane transporter activity	molecular_function	2.9939e-06	0.0010911	8
GO:0015774	polysaccharide transport	biological_process	2.9939e-06	0.0010911	8
GO:0033037	polysaccharide localization	biological_process	2.9939e-06	0.0010911	8
GO:0009987	cellular process	biological_process	4.4263e-06	0.0014788	3467
GO:0050662	coenzyme binding	molecular_function	6.1073e-06	0.0018834	228
GO:0005622	intracellular	cellular_component	7.7392e-06	0.0022162	1525
GO:0044710	single-organism metabolic process	biological_process	1.0527e-05	0.0028134	1393
GO:0005737	cytoplasm	cellular_component	1.9275e-05	0.0048295	710
GO:0044424	intracellular part	cellular_component	2.6986e-05	0.0063639	1400
GO:0005996	monosaccharide metabolic process	biological_process	3.0763e-05	0.0063894	78
GO:0003735	structural constituent of ribosome	molecular_function	3.2162e-05	0.0063894	170
GO:0043228	non-membrane-bounded organelle	cellular_component	3.3469e-05	0.0063894	313
GO:0043232	intracellular non-membrane-bounded organelle	cellular_component	3.3469e-05	0.0063894	313
GO:0005840	ribosome	cellular_component	3.7605e-05	0.0068527	170
GO:0044444	cytoplasmic part	cellular_component	3.961e-05	0.0069041	523
GO:0006412	translation	biological_process	4.1937e-05	0.0070052	244
GO:0008152	metabolic process	biological_process	4.5149e-05	0.0072401	3616
GO:0017150	tRNA dihydrouridine synthase activity	molecular_function	9.8648e-05	0.015211	15
GO:1901362	organic cyclic compound biosynthetic process	biological_process	0.00011314	0.016799	894
GO:0051186	cofactor metabolic process	biological_process	0.00012084	0.017301	169
GO:0046365	monosaccharide catabolic process	biological_process	0.00012958	0.017914	54
GO:0045454	cell redox homeostasis	biological_process	0.00017744	0.023712	59
GO:0019318	hexose metabolic process	biological_process	0.00019652	0.025415	70
GO:1901565	organonitrogen compound catabolic process	biological_process	0.00023194	0.029058	96
GO:0006753	nucleoside phosphate metabolic process	biological_process	0.00024333	0.02956	169
GO:0007059	chromosome segregation	biological_process	0.00025087	0.029581	56
GO:0006006	glucose metabolic process	biological_process	0.00026243	0.03006	58
GO:0055086	nucleobase-containing small molecule metabolic process	biological_process	0.00029417	0.032759	206
GO:0008610	lipid biosynthetic process	biological_process	0.00031173	0.033776	253
GO:1901605	alpha-amino acid metabolic process	biological_process	0.00032647	0.034442	95
GO:0006007	glucose catabolic process	biological_process	0.00036935	0.036098	51
GO:0019320	hexose catabolic process	biological_process	0.00036935	0.036098	51
GO:0005623	cell	cellular_component	0.00037818	0.036098	1589
GO:0044464	cell part	cellular_component	0.00037818	0.036098	1589
GO:0009117	nucleotide metabolic process	biological_process	0.00041057	0.038278	165
GO:0008608	attachment of spindle microtubules to kinetochore	biological_process	0.00044313	0.0392	19
GO:0019752	carboxylic acid metabolic process	biological_process	0.00044962	0.0392	269
GO:1901566	organonitrogen compound biosynthetic process	biological_process	0.00044979	0.0392	282
GO:0019637	organophosphate metabolic process	biological_process	0.00047544	0.040554	244
GO:0043436	oxoacid metabolic process	biological_process	0.00050047	0.041077	269
GO:0000902	cell morphogenesis	biological_process	0.00051231	0.041077	24
GO:0032989	cellular component morphogenesis	biological_process	0.00051231	0.041077	24
GO:0043234	protein complex	cellular_component	0.00052908	0.041338	636
GO:0006082	organic acid metabolic process	biological_process	0.00053619	0.041338	269
GO:0051087	chaperone binding	molecular_function	0.0006531	0.048199	19
GO:0043229	intracellular organelle	cellular_component	0.00066	0.048199	1056
GO:0034453	microtubule anchoring	biological_process	0.00066124	0.048199	20
GO:0043226	organelle	cellular_component	0.00068419	0.048981	1057
GO:1901361	organic cyclic compound catabolic process	biological_process	0.00072601	0.05058	87
GO:0005575	cellular_component	cellular_component	0.00073176	0.05058	2702
GO:0046700	heterocycle catabolic process	biological_process	0.00074754	0.050794	86
GO:0000776	kinetochore	cellular_component	0.00077682	0.051358	30
GO:0030529	ribonucleoprotein complex	cellular_component	0.00078416	0.051358	209
GO:0048869	cellular developmental process	biological_process	0.00079426	0.051358	43
GO:0044255	cellular lipid metabolic process	biological_process	0.00085501	0.054409	289
GO:0044267	cellular protein metabolic process	biological_process	0.00096611	0.060518	907
GO:0019438	aromatic compound biosynthetic process	biological_process	0.001094	0.066704	825
GO:0018130	heterocycle biosynthetic process	biological_process	0.0010981	0.066704	835
GO:0016614	oxidoreductase activity, acting on CH-OH group of donors	molecular_function	0.0011661	0.068967	153
GO:0010467	gene expression	biological_process	0.0011698	0.068967	1047
GO:1901575	organic substance catabolic process	biological_process	0.0012081	0.070193	248
GO:0016616	oxidoreductase activity, acting on the CH-OH group of donors, NAD or NADP as acceptor	molecular_function	0.00131	0.075027	145
GO:0005509	calcium ion binding	molecular_function	0.0013373	0.07551	112
GO:0016052	carbohydrate catabolic process	biological_process	0.0014305	0.078733	66
GO:0044270	cellular nitrogen compound catabolic process	biological_process	0.0014336	0.078733	85
GO:0019439	aromatic compound catabolic process	biological_process	0.0015272	0.08096	85
GO:0000778	condensed nuclear chromosome kinetochore	cellular_component	0.0015954	0.08096	22
GO:0000780	condensed nuclear chromosome, centromeric region	cellular_component	0.0015954	0.08096	22
GO:0000940	condensed chromosome outer kinetochore	cellular_component	0.0015954	0.08096	22
GO:0000942	condensed nuclear chromosome outer kinetochore	cellular_component	0.0015954	0.08096	22
GO:0042729	DASH complex	cellular_component	0.0015954	0.08096	22
GO:0042440	pigment metabolic process	biological_process	0.0016342	0.081893	121
GO:0044271	cellular nitrogen compound biosynthetic process	biological_process	0.0018755	0.092823	834
GO:0071704	organic substance metabolic process	biological_process	0.0020682	0.10111	2896
GO:0044724	single-organism carbohydrate catabolic process	biological_process	0.0021949	0.10444	59
GO:0003854	3-beta-hydroxy-delta5-steroid dehydrogenase activity	molecular_function	0.0022404	0.10444	50
GO:0016229	steroid dehydrogenase activity	molecular_function	0.0022404	0.10444	50
GO:0033764	steroid dehydrogenase activity, acting on the CH-OH group of donors, NAD or NADP as acceptor	molecular_function	0.0022404	0.10444	50
GO:0006720	isoprenoid metabolic process	biological_process	0.0024588	0.11202	50
GO:0008299	isoprenoid biosynthetic process	biological_process	0.0024588	0.11202	50
GO:0000777	condensed chromosome kinetochore	cellular_component	0.0025306	0.11272	22
GO:0000779	condensed chromosome, centromeric region	cellular_component	0.0025306	0.11272	22
GO:0050794	regulation of cellular process	biological_process	0.0026442	0.11649	958
GO:1901606	alpha-amino acid catabolic process	biological_process	0.002746	0.11966	18
GO:0006520	cellular amino acid metabolic process	biological_process	0.0028281	0.12074	184
GO:0009116	nucleoside metabolic process	biological_process	0.0028309	0.12074	151
GO:0009056	catabolic process	biological_process	0.0029002	0.12239	307
GO:0009259	ribonucleotide metabolic process	biological_process	0.0030169	0.12298	118
GO:0019693	ribose phosphate metabolic process	biological_process	0.0030169	0.12298	118
GO:0006629	lipid metabolic process	biological_process	0.003036	0.12298	433
GO:0008202	steroid metabolic process	biological_process	0.0031158	0.12298	55
GO:0009063	cellular amino acid catabolic process	biological_process	0.0031181	0.12298	19
GO:0030076	light-harvesting complex	cellular_component	0.0031379	0.12298	7
GO:1901657	glycosyl compound metabolic process	biological_process	0.0031802	0.12298	151
GO:0016054	organic acid catabolic process	biological_process	0.0031903	0.12298	25
GO:0046395	carboxylic acid catabolic process	biological_process	0.0031903	0.12298	25
GO:0034645	cellular macromolecule biosynthetic process	biological_process	0.0033488	0.12639	1077
GO:0003989	acetyl-CoA carboxylase activity	molecular_function	0.0034259	0.12639	6
GO:0016421	CoA carboxylase activity	molecular_function	0.0034259	0.12639	6
GO:0016885	ligase activity, forming carbon-carbon bonds	molecular_function	0.0034259	0.12639	6
GO:0016627	oxidoreductase activity, acting on the CH-CH group of donors	molecular_function	0.0034503	0.12639	63
GO:0009150	purine ribonucleotide metabolic process	biological_process	0.0034679	0.12639	112
GO:0006163	purine nucleotide metabolic process	biological_process	0.0037367	0.13403	114
GO:0016491	oxidoreductase activity	molecular_function	0.0037444	0.13403	745
GO:0000226	microtubule cytoskeleton organization	biological_process	0.0038117	0.13523	32
GO:0006732	coenzyme metabolic process	biological_process	0.0038482	0.13533	73
GO:0006096	glycolysis	biological_process	0.0038925	0.1357	27
GO:0031406	carboxylic acid binding	molecular_function	0.0041438	0.14321	31
GO:0044454	nuclear chromosome part	cellular_component	0.0042602	0.14532	34
GO:0009059	macromolecule biosynthetic process	biological_process	0.0042774	0.14532	1086
GO:0031072	heat shock protein binding	molecular_function	0.0043702	0.14723	16
GO:0007049	cell cycle	biological_process	0.0045562	0.15221	141
GO:0044723	single-organism carbohydrate metabolic process	biological_process	0.0046233	0.15235	289
GO:0006694	steroid biosynthetic process	biological_process	0.0046363	0.15235	52
GO:0016836	hydro-lyase activity	molecular_function	0.0048978	0.15682	23
GO:0000105	histidine biosynthetic process	biological_process	0.0049286	0.15682	17
GO:0006547	histidine metabolic process	biological_process	0.0049286	0.15682	17
GO:0052803	imidazole-containing compound metabolic process	biological_process	0.0049286	0.15682	17
GO:0005743	mitochondrial inner membrane	cellular_component	0.0049954	0.15715	61
GO:0005819	spindle	cellular_component	0.0050555	0.15715	26
GO:0051536	iron-sulfur cluster binding	molecular_function	0.0051203	0.15715	60
GO:0051540	metal cluster binding	molecular_function	0.0051203	0.15715	60
GO:0016667	oxidoreductase activity, acting on a sulfur group of donors	molecular_function	0.0051512	0.15715	55
GO:0072686	mitotic spindle	cellular_component	0.0051742	0.15715	18
GO:0015630	microtubule cytoskeleton	cellular_component	0.0052472	0.15817	37
GO:0004348	glucosylceramidase activity	molecular_function	0.0053869	0.16116	6
GO:0016597	amino acid binding	molecular_function	0.0055959	0.16618	26
GO:0046148	pigment biosynthetic process	biological_process	0.0058077	0.1712	101
GO:0006807	nitrogen compound metabolic process	biological_process	0.0058638	0.17133	1516
GO:0016886	ligase activity, forming phosphoric ester bonds	molecular_function	0.0059196	0.17133	12
GO:0008150	biological_process	biological_process	0.0059402	0.17133	4575
0g006250.2,Solyc12g044890.1,Solyc11g012680.1,Solyc04g049800.2,Solyc02g032200.2,Solyc01g087820.2,Solyc05g006980.2,Solyc06g069190.2,Solyc01g009830.2,Solyc10g051140.1,Solyc12g014610.1,Solyc01g095890.2,Solyc01g008660.2,Solyc04g081760.2,Solyc12g044850.1,Solyc02g093080.2,Solyc11g006590.1,Solyc03g032210.2,Solyc11g072820.1,Solyc11g005020.1,Solyc09g014890.2,Solyc03g026020.2,Solyc04g008020.2,Solyc02g069670…	2471	Novel00123,Solyc12g044940.1,Solyc02g079170.2,Solyc10g007610.2,Solyc01g060130.2,Solyc05g052960.2,Solyc06g009660.2,Solyc10g079080.1,Solyc11g008450.1,Solyc09g082320.2,Solyc06g071110.2,Solyc01g096200.2,Solyc02g068310.2,Solyc06g069550.1,Solyc07g007370.2,Solyc02g084560.2,Solyc04g082250.2,Solyc12g100130.1,Solyc01g056940.2,Solyc08g066320.2,Solyc04g011360.2,Solyc10g054790.1,Solyc05g016310.1,Solyc11g069150…
1,Solyc02g081380.2,Solyc03g113330.2,Solyc10g083650.1,Solyc09g092030.2,Solyc04g009630.2,Solyc02g081660.2,Solyc02g088900.2,Solyc09g014720.1,Solyc02g014380.2,Solyc08g077920.2,Solyc01g095720.2,Solyc02g093020.2,Solyc06g053930.2,Solyc11g069300.1,Solyc09g065850.2,Solyc10g078610.1,Solyc05g006850.2,Solyc10g008600.2,Solyc02g068450.2,Solyc04g080850.2,Solyc02g093860.2,Solyc12g088730.1,Solyc03g096360.2,Solyc0…
GO:0015144	carbohydrate transmembrane transporter activity	molecular_function	0.006463	0.18376	27
GO:1901476	carbohydrate transporter activity	molecular_function	0.006463	0.18376	27
GO:0007186	G-protein coupled receptor signaling pathway	biological_process	0.0065957	0.18464	66
GO:0016053	organic acid biosynthetic process	biological_process	0.0066321	0.18464	125
GO:0046394	carboxylic acid biosynthetic process	biological_process	0.0066321	0.18464	125
GO:0005960	glycine cleavage complex	cellular_component	0.0066958	0.18513	7
GO:1901135	carbohydrate derivative metabolic process	biological_process	0.0068619	0.18842	323
GO:0006568	tryptophan metabolic process	biological_process	0.0071074	0.19123	6
GO:0006586	indolalkylamine metabolic process	biological_process	0.0071074	0.19123	6
GO:0042430	indole-containing compound metabolic process	biological_process	0.0071074	0.19123	6
GO:0000794	condensed nuclear chromosome	cellular_component	0.007446	0.19697	29
GO:0009119	ribonucleoside metabolic process	biological_process	0.0074893	0.19697	138
GO:0015035	protein disulfide oxidoreductase activity	molecular_function	0.0075173	0.19697	29
GO:0015036	disulfide oxidoreductase activity	molecular_function	0.0075173	0.19697	29
GO:0006778	porphyrin-containing compound metabolic process	biological_process	0.0080507	0.20958	100
GO:0003847	1-alkyl-2-acetylglycerophosphocholine esterase activity	molecular_function	0.0083848	0.21466	7
GO:0006796	phosphate-containing compound metabolic process	biological_process	0.0085779	0.21466	668
GO:0051188	cofactor biosynthetic process	biological_process	0.0086339	0.21466	125
GO:0009317	acetyl-CoA carboxylase complex	cellular_component	0.0086479	0.21466	5
GO:0019725	cellular homeostasis	biological_process	0.0086925	0.21466	62
GO:0006544	glycine metabolic process	biological_process	0.0086953	0.21466	14
GO:0008652	cellular amino acid biosynthetic process	biological_process	0.0087338	0.21466	86
GO:0004298	threonine-type endopeptidase activity	molecular_function	0.0087718	0.21466	12
GO:0070003	threonine-type peptidase activity	molecular_function	0.0087718	0.21466	12
GO:0008172	S-methyltransferase activity	molecular_function	0.0087813	0.21466	14
GO:0005829	cytosol	cellular_component	0.0088935	0.21478	26
GO:0044445	cytosolic part	cellular_component	0.0088935	0.21478	26
GO:0003910	DNA ligase (ATP) activity	molecular_function	0.0090882	0.2165	7
GO:0022402	cell cycle process	biological_process	0.0091765	0.2165	70
GO:0006546	glycine catabolic process	biological_process	0.0091806	0.2165	10
GO:0009071	serine family amino acid catabolic process	biological_process	0.0091806	0.2165	10
GO:0042651	thylakoid membrane	cellular_component	0.0097247	0.22799	9
GO:0006091	generation of precursor metabolites and energy	biological_process	0.0098782	0.23024	99
GO:0009653	anatomical structure morphogenesis	biological_process	0.009969	0.23102	37
GO:0005198	structural molecule activity	molecular_function	0.010071	0.23205	275
GO:0006793	phosphorus metabolic process	biological_process	0.010212	0.23394	668
GO:0044238	primary metabolic process	biological_process	0.010307	0.23479	2773
GO:0007264	small GTPase mediated signal transduction	biological_process	0.010413	0.23586	123
GO:0019898	extrinsic to membrane	cellular_component	0.010594	0.2386	23
GO:0010181	FMN binding	molecular_function	0.010888	0.24385	17
GO:0034654	nucleobase-containing compound biosynthetic process	biological_process	0.011402	0.25203	726
GO:1901607	alpha-amino acid biosynthetic process	biological_process	0.011407	0.25203	61
GO:0072521	purine-containing compound metabolic process	biological_process	0.011441	0.25203	138
GO:0006414	translational elongation	biological_process	0.011594	0.25302	27
GO:0005975	carbohydrate metabolic process	biological_process	0.011613	0.25302	464
GO:0034655	nucleobase-containing compound catabolic process	biological_process	0.011723	0.2538	61
GO:0044282	small molecule catabolic process	biological_process	0.011838	0.2538	27
GO:0044712	single-organism catabolic process	biological_process	0.011838	0.2538	27
GO:0004143	diacylglycerol kinase activity	molecular_function	0.01202	0.25633	12
GO:0004026	alcohol O-acetyltransferase activity	molecular_function	0.012916	0.27253	7
GO:0034318	alcohol O-acyltransferase activity	molecular_function	0.012916	0.27253	7
GO:0044283	small molecule biosynthetic process	biological_process	0.013423	0.28173	149
GO:0009141	nucleoside triphosphate metabolic process	biological_process	0.013571	0.28336	96
GO:0050789	regulation of biological process	biological_process	0.013787	0.28638	1002
GO:0009144	purine nucleoside triphosphate metabolic process	biological_process	0.014327	0.2918	94
GO:0009199	ribonucleoside triphosphate metabolic process	biological_process	0.014327	0.2918	94
GO:0009205	purine ribonucleoside triphosphate metabolic process	biological_process	0.014327	0.2918	94
GO:0046834	lipid phosphorylation	biological_process	0.014412	0.2918	8
GO:0046854	phosphatidylinositol phosphorylation	biological_process	0.014412	0.2918	8
GO:0042278	purine nucleoside metabolic process	biological_process	0.014752	0.2957	130
GO:0046128	purine ribonucleoside metabolic process	biological_process	0.014752	0.2957	130
GO:0008643	carbohydrate transport	biological_process	0.014848	0.29614	28
GO:0019866	organelle inner membrane	cellular_component	0.015021	0.29812	61
GO:0000228	nuclear chromosome	cellular_component	0.015565	0.30738	37
GO:0008374	O-acyltransferase activity	molecular_function	0.016039	0.3152	27
GO:1901292	nucleoside phosphate catabolic process	biological_process	0.016553	0.32371	49
GO:0009163	nucleoside biosynthetic process	biological_process	0.016787	0.32513	69
GO:0042455	ribonucleoside biosynthetic process	biological_process	0.016787	0.32513	69
GO:0035556	intracellular signal transduction	biological_process	0.017293	0.33192	157
GO:0009072	aromatic amino acid family metabolic process	biological_process	0.017366	0.33192	18
GO:0000775	chromosome, centromeric region	cellular_component	0.017387	0.33192	42
GO:0005787	signal peptidase complex	cellular_component	0.017593	0.33269	9
GO:0006465	signal peptide processing	biological_process	0.017593	0.33269	9
GO:0019236	response to pheromone	biological_process	0.017754	0.33416	6
GO:0006098	pentose-phosphate shunt	biological_process	0.018059	0.33674	24
GO:0006740	NADPH regeneration	biological_process	0.018059	0.33674	24
GO:0000793	condensed chromosome	cellular_component	0.018539	0.33678	29
GO:0003909	DNA ligase activity	molecular_function	0.018833	0.33678	9
GO:0006772	thiamine metabolic process	biological_process	0.018881	0.33678	11
GO:0009228	thiamine biosynthetic process	biological_process	0.018881	0.33678	11
GO:0042723	thiamine-containing compound metabolic process	biological_process	0.018881	0.33678	11
GO:0042724	thiamine-containing compound biosynthetic process	biological_process	0.018881	0.33678	11
GO:0046149	pigment catabolic process	biological_process	0.018905	0.33678	21
GO:0044711	single-organism biosynthetic process	biological_process	0.019064	0.33678	154
GO:0032507	maintenance of protein location in cell	biological_process	0.019081	0.33678	28
GO:0045185	maintenance of protein location	biological_process	0.019081	0.33678	28
GO:0051235	maintenance of location	biological_process	0.019081	0.33678	28
GO:0051651	maintenance of location in cell	biological_process	0.019081	0.33678	28
GO:1901659	glycosyl compound biosynthetic process	biological_process	0.019305	0.33678	69
GO:0006818	hydrogen transport	biological_process	0.019399	0.33678	111
GO:0015992	proton transport	biological_process	0.019399	0.33678	111
GO:0050664	oxidoreductase activity, acting on NAD(P)H, oxygen as acceptor	molecular_function	0.019405	0.33678	6
GO:0003924	GTPase activity	molecular_function	0.01989	0.3437	163
GO:0006739	NADP metabolic process	biological_process	0.020979	0.36096	30
GO:0016832	aldehyde-lyase activity	molecular_function	0.021217	0.36215	10
GO:0009538	photosystem I reaction center	cellular_component	0.021228	0.36215	10
GO:0015994	chlorophyll metabolic process	biological_process	0.022323	0.37921	74
GO:0019835	cytolysis	biological_process	0.022638	0.38202	7
GO:0006848	pyruvate transport	biological_process	0.022903	0.38202	6
GO:0006850	mitochondrial pyruvate transport	biological_process	0.022903	0.38202	6
GO:0007131	reciprocal meiotic recombination	biological_process	0.022965	0.38202	8
GO:0035825	reciprocal DNA recombination	biological_process	0.022965	0.38202	8
GO:0009166	nucleotide catabolic process	biological_process	0.02311	0.38284	48
GO:0055036	virion membrane	cellular_component	0.02335	0.38408	6
GO:0006457	protein folding	biological_process	0.023378	0.38408	66
GO:0030170	pyridoxal phosphate binding	molecular_function	0.023472	0.38408	49
GO:0051082	unfolded protein binding	molecular_function	0.024089	0.39257	51
GO:1901360	organic cyclic compound metabolic process	biological_process	0.0244	0.3933	1425
GO:0006195	purine nucleotide catabolic process	biological_process	0.024528	0.3933	47
GO:0072523	purine-containing compound catabolic process	biological_process	0.024528	0.3933	47
GO:0007205	protein kinase C-activating G-protein coupled receptor signaling pathway	biological_process	0.024583	0.3933	11
GO:0015672	monovalent inorganic cation transport	biological_process	0.024624	0.3933	167
GO:0071103	DNA conformation change	biological_process	0.025131	0.3998	33
GO:0008053	mitochondrial fusion	biological_process	0.025937	0.411	9
GO:0043648	dicarboxylic acid metabolic process	biological_process	0.026337	0.41568	22
GO:0004616	phosphogluconate dehydrogenase (decarboxylating) activity	molecular_function	0.026737	0.42034	22
GO:0044425	membrane part	cellular_component	0.026964	0.42226	877
GO:0055114	oxidation-reduction process	biological_process	0.027554	0.42468	696
GO:0009069	serine family amino acid metabolic process	biological_process	0.02756	0.42468	19
GO:0004484	mRNA guanylyltransferase activity	molecular_function	0.027587	0.42468	8
GO:0009154	purine ribonucleotide catabolic process	biological_process	0.027878	0.42468	46
GO:0009261	ribonucleotide catabolic process	biological_process	0.027878	0.42468	46
GO:0000785	chromatin	cellular_component	0.027938	0.42468	12
GO:0005788	endoplasmic reticulum lumen	cellular_component	0.028075	0.42468	7
GO:0051301	cell division	biological_process	0.028381	0.42468	61
GO:0015996	chlorophyll catabolic process	biological_process	0.028521	0.42468	20
GO:0047746	chlorophyllase activity	molecular_function	0.028521	0.42468	20
GO:0046039	GTP metabolic process	biological_process	0.028563	0.42468	45
GO:0008135	translation factor activity, nucleic acid binding	molecular_function	0.028641	0.42468	39
GO:0044422	organelle part	cellular_component	0.028722	0.42468	479
GO:0009164	nucleoside catabolic process	biological_process	0.028813	0.42468	45
GO:0042454	ribonucleoside catabolic process	biological_process	0.028813	0.42468	45
GO:1901658	glycosyl compound catabolic process	biological_process	0.028813	0.42468	45
GO:0032787	monocarboxylic acid metabolic process	biological_process	0.029043	0.4265	80
GO:0042451	purine nucleoside biosynthetic process	biological_process	0.029286	0.42694	62
GO:0046129	purine ribonucleoside biosynthetic process	biological_process	0.029286	0.42694	62
GO:0009260	ribonucleotide biosynthetic process	biological_process	0.030297	0.43848	68
GO:0046390	ribose phosphate biosynthetic process	biological_process	0.030297	0.43848	68
GO:0006184	GTP catabolic process	biological_process	0.031521	0.45293	42
GO:1901069	guanosine-containing compound catabolic process	biological_process	0.031521	0.45293	42
GO:0004332	fructose-bisphosphate aldolase activity	molecular_function	0.031675	0.45352	7
GO:0006298	mismatch repair	biological_process	0.031826	0.45379	21
GO:0019362	pyridine nucleotide metabolic process	biological_process	0.032194	0.45379	31
GO:0046496	nicotinamide nucleotide metabolic process	biological_process	0.032194	0.45379	31
GO:0072524	pyridine-containing compound metabolic process	biological_process	0.032194	0.45379	31
GO:0030248	cellulose binding	molecular_function	0.03226	0.45379	3
GO:0033013	tetrapyrrole metabolic process	biological_process	0.032499	0.45555	113
GO:0071203	WASH complex	cellular_component	0.032978	0.45953	9
GO:0072522	purine-containing compound biosynthetic process	biological_process	0.033012	0.45953	67
GO:0006213	pyrimidine nucleoside metabolic process	biological_process	0.033745	0.46682	12
GO:0036355	2-iminoacetate synthase activity	molecular_function	0.033769	0.46682	8
GO:0007606	sensory perception of chemical stimulus	biological_process	0.034377	0.47182	10
GO:0006721	terpenoid metabolic process	biological_process	0.034483	0.47182	35
GO:0016114	terpenoid biosynthetic process	biological_process	0.034483	0.47182	35
GO:0009066	aspartate family amino acid metabolic process	biological_process	0.034826	0.47322	26
GO:0034641	cellular nitrogen compound metabolic process	biological_process	0.03504	0.47322	1396
GO:0008443	phosphofructokinase activity	molecular_function	0.035187	0.47322	13
GO:0019200	carbohydrate kinase activity	molecular_function	0.035187	0.47322	13
GO:0009152	purine ribonucleotide biosynthetic process	biological_process	0.035242	0.47322	62
GO:0004834	tryptophan synthase activity	molecular_function	0.035294	0.47322	3
GO:0044446	intracellular organelle part	cellular_component	0.035657	0.4765	472
GO:0008283	cell proliferation	biological_process	0.036655	0.48792	7
GO:0006779	porphyrin-containing compound biosynthetic process	biological_process	0.036783	0.48792	79
GO:0044427	chromosomal part	cellular_component	0.036877	0.48792	63
GO:0090407	organophosphate biosynthetic process	biological_process	0.037238	0.48883	116
GO:0046812	host cell surface binding	molecular_function	0.037265	0.48883	7
GO:0005798	Golgi-associated vesicle	cellular_component	0.037524	0.48883	13
GO:0030660	Golgi-associated vesicle membrane	cellular_component	0.037524	0.48883	13
GO:0007166	cell surface receptor signaling pathway	biological_process	0.037823	0.48883	81
GO:0042602	riboflavin reductase (NADPH) activity	molecular_function	0.038245	0.48883	3
GO:0000786	nucleosome	cellular_component	0.038785	0.48883	10
GO:0032993	protein-DNA complex	cellular_component	0.038785	0.48883	10
GO:0072527	pyrimidine-containing compound metabolic process	biological_process	0.038883	0.48883	27
GO:0006152	purine nucleoside catabolic process	biological_process	0.039055	0.48883	44
GO:0009143	nucleoside triphosphate catabolic process	biological_process	0.039055	0.48883	44
GO:0009146	purine nucleoside triphosphate catabolic process	biological_process	0.039055	0.48883	44
GO:0009203	ribonucleoside triphosphate catabolic process	biological_process	0.039055	0.48883	44
GO:0009207	purine ribonucleoside triphosphate catabolic process	biological_process	0.039055	0.48883	44
GO:0046130	purine ribonucleoside catabolic process	biological_process	0.039055	0.48883	44
GO:0016469	proton-transporting two-sector ATPase complex	cellular_component	0.039064	0.48883	101
GO:0030077	plasma membrane light-harvesting complex	cellular_component	0.03914	0.48883	4
GO:0042716	plasma membrane-derived chromatophore	cellular_component	0.03914	0.48883	4
GO:0016772	transferase activity, transferring phosphorus-containing groups	molecular_function	0.039437	0.491	749
GO:0003690	double-stranded DNA binding	molecular_function	0.039641	0.49202	25
GO:0050660	flavin adenine dinucleotide binding	molecular_function	0.039826	0.49279	80
GO:0006944	cellular membrane fusion	biological_process	0.040074	0.49281	11
GO:0048284	organelle fusion	biological_process	0.040074	0.49281	11
GO:0030983	mismatched DNA binding	molecular_function	0.040346	0.49464	20
GO:0016773	phosphotransferase activity, alcohol group as acceptor	molecular_function	0.040756	0.49516	520
GO:0007608	sensory perception of smell	biological_process	0.040899	0.49516	4
GO:0015078	hydrogen ion transmembrane transporter activity	molecular_function	0.040904	0.49516	129
GO:0005694	chromosome	cellular_component	0.041207	0.49516	78
GO:0042803	protein homodimerization activity	molecular_function	0.041221	0.49516	32
GO:0004743	pyruvate kinase activity	molecular_function	0.041339	0.49516	7
GO:1901293	nucleoside phosphate biosynthetic process	biological_process	0.041351	0.49516	85
GO:0006913	nucleocytoplasmic transport	biological_process	0.0415	0.49516	25
GO:0051169	nuclear transport	biological_process	0.0415	0.49516	25
GO:0006164	purine nucleotide biosynthetic process	biological_process	0.04174	0.49611	63
GO:0009061	anaerobic respiration	biological_process	0.041919	0.49611	12
GO:1901137	carbohydrate derivative biosynthetic process	biological_process	0.041951	0.49611	194
GO:1901068	guanosine-containing compound metabolic process	biological_process	0.042207	0.49768	47
GO:0000280	nuclear division	biological_process	0.042768	0.49982	20
GO:0007067	mitosis	biological_process	0.042768	0.49982	20
GO:0000015	phosphopyruvate hydratase complex	cellular_component	0.043194	0.49982	4
GO:0004634	phosphopyruvate hydratase activity	molecular_function	0.043194	0.49982	4
GO:0018580	nitronate monooxygenase activity	molecular_function	0.043207	0.49982	7
GO:0042995	cell projection	cellular_component	0.043368	0.49982	29
GO:0001071	nucleic acid binding transcription factor activity	molecular_function	0.043386	0.49982	250
GO:0003700	sequence-specific DNA binding transcription factor activity	molecular_function	0.043386	0.49982	250
GO:0004308	exo-alpha-sialidase activity	molecular_function	0.044617	0.50705	4
GO:0016997	alpha-sialidase activity	molecular_function	0.044617	0.50705	4
GO:0005856	cytoskeleton	cellular_component	0.044649	0.50705	78
GO:0009308	amine metabolic process	biological_process	0.044749	0.50705	42
GO:0030089	phycobilisome	cellular_component	0.045133	0.50705	3
GO:0016020	membrane	cellular_component	0.045236	0.50705	1445
GO:0045980	negative regulation of nucleotide metabolic process	biological_process	0.04549	0.50705	4
GO:0006787	porphyrin-containing compound catabolic process	biological_process	0.045569	0.50705	21
GO:0033015	tetrapyrrole catabolic process	biological_process	0.045569	0.50705	21
GO:0051187	cofactor catabolic process	biological_process	0.045569	0.50705	21
GO:0046915	transition metal ion transmembrane transporter activity	molecular_function	0.046048	0.50705	45
GO:0007005	mitochondrion organization	biological_process	0.046105	0.50705	23
GO:0016108	tetraterpenoid metabolic process	biological_process	0.046157	0.50705	27
GO:0016109	tetraterpenoid biosynthetic process	biological_process	0.046157	0.50705	27
GO:0016116	carotenoid metabolic process	biological_process	0.046157	0.50705	27
GO:0016117	carotenoid biosynthetic process	biological_process	0.046157	0.50705	27
GO:0005839	proteasome core complex	cellular_component	0.046165	0.50705	15
GO:0009165	nucleotide biosynthetic process	biological_process	0.046428	0.50855	83
GO:0060590	ATPase regulator activity	molecular_function	0.046872	0.51132	13
GO:0010207	photosystem II assembly	biological_process	0.047337	0.51132	2
GO:0008192	RNA guanylyltransferase activity	molecular_function	0.04757	0.51132	8
GO:0070568	guanylyltransferase activity	molecular_function	0.04757	0.51132	8
GO:0048856	anatomical structure development	biological_process	0.048022	0.51132	48
GO:0065007	biological regulation	biological_process	0.048293	0.51132	1049
GO:0016538	cyclin-dependent protein serine/threonine kinase regulator activity	molecular_function	0.048701	0.51132	5
GO:0030126	COPI vesicle coat	cellular_component	0.048865	0.51132	9
GO:0030137	COPI-coated vesicle	cellular_component	0.048865	0.51132	9
GO:0030663	COPI-coated vesicle membrane	cellular_component	0.048865	0.51132	9
GO:0006576	cellular biogenic amine metabolic process	biological_process	0.048886	0.51132	33
GO:0015947	methane metabolic process	biological_process	0.049073	0.51132	11
GO:0015948	methanogenesis	biological_process	0.049073	0.51132	11
GO:0015975	energy derivation by oxidation of reduced inorganic compounds	biological_process	0.049073	0.51132	11
GO:0043446	cellular alkane metabolic process	biological_process	0.049073	0.51132	11
GO:0043447	alkane biosynthetic process	biological_process	0.049073	0.51132	11
GO:0010921	regulation of phosphatase activity	biological_process	0.04922	0.51132	4
GO:0035303	regulation of dephosphorylation	biological_process	0.04922	0.51132	4
GO:0043666	regulation of phosphoprotein phosphatase activity	biological_process	0.04922	0.51132	4
GO:0044248	cellular catabolic process	biological_process	0.049232	0.51132	220
GO:0000271	polysaccharide biosynthetic process	biological_process	0.049406	0.51181	133
GO:0009349	riboflavin synthase complex	cellular_component	0.049694	0.5127	2
GO:0031966	mitochondrial membrane	cellular_component	0.049844	0.5127	88
GO:0016813	hydrolase activity, acting on carbon-nitrogen (but not peptide) bonds, in linear amidines	molecular_function	0.049922	0.5127	7
GO:0009084	glutamine family amino acid biosynthetic process	biological_process	0.050124	0.5127	12
GO:0009067	aspartate family amino acid biosynthetic process	biological_process	0.050132	0.5127	22
GO:0043603	cellular amide metabolic process	biological_process	0.050814	0.51836	25
GO:0003879	ATP phosphoribosyltransferase activity	molecular_function	0.051074	0.51932	3
GO:0015936	coenzyme A metabolic process	biological_process	0.051167	0.51932	10
GO:0044430	cytoskeletal part	cellular_component	0.051569	0.52079	71
GO:0031683	G-protein beta/gamma-subunit complex binding	molecular_function	0.051572	0.52079	25
GO:0044455	mitochondrial membrane part	cellular_component	0.052116	0.52496	51
GO:0070851	growth factor receptor binding	molecular_function	0.052774	0.52863	9
GO:0006733	oxidoreduction coenzyme metabolic process	biological_process	0.052866	0.52863	34
GO:0007050	cell cycle arrest	biological_process	0.052876	0.52863	8
GO:0007283	spermatogenesis	biological_process	0.054604	0.5432	5
GO:0048232	male gamete generation	biological_process	0.054604	0.5432	5
GO:0016874	ligase activity	molecular_function	0.05485	0.54415	279
GO:0000278	mitotic cell cycle	biological_process	0.054971	0.54415	21
GO:0005134	interleukin-2 receptor binding	molecular_function	0.055552	0.54854	5
GO:0006839	mitochondrial transport	biological_process	0.055762	0.54927	14
GO:0033692	cellular polysaccharide biosynthetic process	biological_process	0.056707	0.5572	131
GO:0072511	divalent inorganic cation transport	biological_process	0.057083	0.55953	49
GO:0016703	oxidoreductase activity, acting on single donors with incorporation of molecular oxygen, incorporation of one atom of oxygen (internal monooxygenases or internal mixed function oxidases)	molecular_function	0.057324	0.56052	10
GO:0000774	adenyl-nucleotide exchange factor activity	molecular_function	0.057909	0.56486	10
GO:0003899	DNA-directed RNA polymerase activity	molecular_function	0.058093	0.56527	63
GO:0033176	proton-transporting V-type ATPase complex	cellular_component	0.059897	0.58024	48
GO:0032774	RNA biosynthetic process	biological_process	0.05992	0.58024	637
GO:0003746	translation elongation factor activity	molecular_function	0.060912	0.58404	14
GO:0006959	humoral immune response	biological_process	0.061268	0.58404	3
GO:0042381	hemolymph coagulation	biological_process	0.061268	0.58404	3
GO:0008653	lipopolysaccharide metabolic process	biological_process	0.061343	0.58404	85
GO:0009103	lipopolysaccharide biosynthetic process	biological_process	0.061343	0.58404	85
GO:0045786	negative regulation of cell cycle	biological_process	0.061381	0.58404	10
GO:0008121	ubiquinol-cytochrome-c reductase activity	molecular_function	0.061635	0.58404	7
GO:0016681	oxidoreductase activity, acting on diphenols and related substances as donors, cytochrome as acceptor	molecular_function	0.061635	0.58404	7
GO:0008158	hedgehog receptor activity	molecular_function	0.061671	0.58404	2
GO:0032403	protein complex binding	molecular_function	0.061769	0.58404	26
GO:0015077	monovalent inorganic cation transmembrane transporter activity	molecular_function	0.062494	0.58685	158
GO:0040008	regulation of growth	biological_process	0.062562	0.58685	2
GO:0009496	plastoquinol--plastocyanin reductase activity	molecular_function	0.062652	0.58685	2
GO:0052880	oxidoreductase activity, acting on diphenols and related substances as donors, with copper protein as acceptor	molecular_function	0.062652	0.58685	2
GO:0016829	lyase activity	molecular_function	0.062958	0.58834	151
GO:0044106	cellular amine metabolic process	biological_process	0.064561	0.60192	33
GO:0003855	3-dehydroquinate dehydratase activity	molecular_function	0.064897	0.60365	4
GO:0016670	oxidoreductase activity, acting on a sulfur group of donors, oxygen as acceptor	molecular_function	0.06553	0.60812	10
GO:0045226	extracellular polysaccharide biosynthetic process	biological_process	0.066498	0.61153	28
GO:0046379	extracellular polysaccharide metabolic process	biological_process	0.066498	0.61153	28
GO:0032270	positive regulation of cellular protein metabolic process	biological_process	0.066507	0.61153	6
GO:0051247	positive regulation of protein metabolic process	biological_process	0.066507	0.61153	6
GO:0004425	indole-3-glycerol-phosphate synthase activity	molecular_function	0.067125	0.61191	4
GO:0008484	sulfuric ester hydrolase activity	molecular_function	0.067396	0.61191	3
GO:0002161	aminoacyl-tRNA editing activity	molecular_function	0.067525	0.61191	5
GO:0009108	coenzyme biosynthetic process	biological_process	0.067681	0.61191	44
GO:0004107	chorismate synthase activity	molecular_function	0.068001	0.61191	3
GO:0033865	nucleoside bisphosphate metabolic process	biological_process	0.068178	0.61191	12
GO:0033875	ribonucleoside bisphosphate metabolic process	biological_process	0.068178	0.61191	12
GO:0034032	purine nucleoside bisphosphate metabolic process	biological_process	0.068178	0.61191	12
GO:0030269	tetrahydromethanopterin S-methyltransferase activity	molecular_function	0.06867	0.61191	7
GO:0042086	5-methyl-5,6,7,8-tetrahydromethanopterin-dependent methyltransferase activity	molecular_function	0.06867	0.61191	7
GO:0048285	organelle fission	biological_process	0.069211	0.61191	21
GO:0009142	nucleoside triphosphate biosynthetic process	biological_process	0.069214	0.61191	51
GO:0009145	purine nucleoside triphosphate biosynthetic process	biological_process	0.069214	0.61191	51
GO:0009201	ribonucleoside triphosphate biosynthetic process	biological_process	0.069214	0.61191	51
GO:0009206	purine ribonucleoside triphosphate biosynthetic process	biological_process	0.069214	0.61191	51
GO:0010563	negative regulation of phosphorus metabolic process	biological_process	0.069244	0.61191	4
GO:0045936	negative regulation of phosphate metabolic process	biological_process	0.069244	0.61191	4
GO:0043021	ribonucleoprotein complex binding	molecular_function	0.069296	0.61191	7
GO:0006725	cellular aromatic compound metabolic process	biological_process	0.069518	0.61252	1369
GO:0006351	transcription, DNA-dependent	biological_process	0.070366	0.61864	628
GO:0015985	energy coupled proton transport, down electrochemical gradient	biological_process	0.071028	0.62173	46
GO:0015986	ATP synthesis coupled proton transport	biological_process	0.071028	0.62173	46
GO:0016763	transferase activity, transferring pentosyl groups	molecular_function	0.071714	0.62637	25
GO:0034220	ion transmembrane transport	biological_process	0.072084	0.62741	136
GO:0006633	fatty acid biosynthetic process	biological_process	0.072146	0.62741	38
GO:0022890	inorganic cation transmembrane transporter activity	molecular_function	0.072956	0.63188	213
GO:0004325	ferrochelatase activity	molecular_function	0.073237	0.63188	4
GO:0046417	chorismate metabolic process	biological_process	0.073411	0.63188	2
GO:0006537	glutamate biosynthetic process	biological_process	0.073449	0.63188	8
GO:0043650	dicarboxylic acid biosynthetic process	biological_process	0.073449	0.63188	8
GO:0051537	2 iron, 2 sulfur cluster binding	molecular_function	0.073939	0.63474	13
GO:0046483	heterocycle metabolic process	biological_process	0.074139	0.6351	1371
GO:0005351	sugar:hydrogen symporter activity	molecular_function	0.074733	0.63738	14
GO:0015295	solute:hydrogen symporter activity	molecular_function	0.074733	0.63738	14
GO:0031090	organelle membrane	cellular_component	0.074884	0.63738	168
GO:0005732	small nucleolar ribonucleoprotein complex	cellular_component	0.07583	0.64094	3
GO:0006050	mannosamine metabolic process	biological_process	0.075941	0.64094	3
GO:0006051	N-acetylmannosamine metabolic process	biological_process	0.075941	0.64094	3
GO:0047465	N-acylglucosamine-6-phosphate 2-epimerase activity	molecular_function	0.075941	0.64094	3
GO:0016853	isomerase activity	molecular_function	0.076325	0.64272	75
GO:0003916	DNA topoisomerase activity	molecular_function	0.07687	0.64272	13
GO:0015093	ferrous iron transmembrane transporter activity	molecular_function	0.076895	0.64272	34
GO:0015684	ferrous iron transport	biological_process	0.076895	0.64272	34
GO:0033365	protein localization to organelle	biological_process	0.076954	0.64272	60
GO:0046434	organophosphate catabolic process	biological_process	0.077914	0.6477	56
GO:0030976	thiamine pyrophosphate binding	molecular_function	0.07805	0.6477	13
GO:0019220	regulation of phosphate metabolic process	biological_process	0.078203	0.6477	35
GO:0051174	regulation of phosphorus metabolic process	biological_process	0.078203	0.6477	35
GO:0006754	ATP biosynthetic process	biological_process	0.078358	0.6477	48
GO:0000062	fatty-acyl-CoA binding	molecular_function	0.078795	0.64998	4
GO:0006790	sulfur compound metabolic process	biological_process	0.080757	0.66438	43
GO:0016830	carbon-carbon lyase activity	molecular_function	0.080872	0.66438	63
GO:0043227	membrane-bounded organelle	cellular_component	0.081394	0.66709	826
GO:0006536	glutamate metabolic process	biological_process	0.081602	0.66709	9
GO:0006631	fatty acid metabolic process	biological_process	0.081865	0.66709	68
GO:0043231	intracellular membrane-bounded organelle	cellular_component	0.082189	0.66709	825
GO:0005929	cilium	cellular_component	0.082201	0.66709	20
GO:0031514	motile cilium	cellular_component	0.082201	0.66709	20
GO:0009654	oxygen evolving complex	cellular_component	0.082615	0.6691	11
GO:0005230	extracellular ligand-gated ion channel activity	molecular_function	0.083121	0.67051	15
GO:0008898	homocysteine S-methyltransferase activity	molecular_function	0.083333	0.67051	3
GO:0003872	6-phosphofructokinase activity	molecular_function	0.083612	0.67051	7
GO:0005945	6-phosphofructokinase complex	cellular_component	0.083612	0.67051	7
GO:0033177	proton-transporting two-sector ATPase complex, proton-transporting domain	cellular_component	0.083626	0.67051	72
GO:0004789	thiamine-phosphate diphosphorylase activity	molecular_function	0.084319	0.67472	5
GO:0003995	acyl-CoA dehydrogenase activity	molecular_function	0.085276	0.68102	9
GO:0006518	peptide metabolic process	biological_process	0.085963	0.68287	16
GO:0006605	protein targeting	biological_process	0.086523	0.68287	60
GO:0046789	host cell surface receptor binding	molecular_function	0.087129	0.68287	6
GO:0005753	mitochondrial proton-transporting ATP synthase complex	cellular_component	0.087293	0.68287	35
GO:0006458	'de novo' protein folding	biological_process	0.087715	0.68287	11
GO:0051084	'de novo' posttranslational protein folding	biological_process	0.087715	0.68287	11
GO:0051085	chaperone mediated protein folding requiring cofactor	biological_process	0.087715	0.68287	11
GO:0061077	chaperone-mediated protein folding	biological_process	0.087715	0.68287	11
GO:0030955	potassium ion binding	molecular_function	0.087863	0.68287	8
GO:0031420	alkali metal ion binding	molecular_function	0.087863	0.68287	8
GO:0005381	iron ion transmembrane transporter activity	molecular_function	0.08823	0.68287	37
GO:0019953	sexual reproduction	biological_process	0.088242	0.68287	13
GO:0006323	DNA packaging	biological_process	0.08867	0.68287	21
GO:0006449	regulation of translational termination	biological_process	0.088744	0.68287	4
GO:0006452	translational frameshifting	biological_process	0.088744	0.68287	4
GO:0043243	positive regulation of protein complex disassembly	biological_process	0.088744	0.68287	4
GO:0045727	positive regulation of translation	biological_process	0.088744	0.68287	4
GO:0045901	positive regulation of translational elongation	biological_process	0.088744	0.68287	4
GO:0045905	positive regulation of translational termination	biological_process	0.088744	0.68287	4
GO:0004861	cyclin-dependent protein serine/threonine kinase inhibitor activity	molecular_function	0.090304	0.69242	4
GO:0034637	cellular carbohydrate biosynthetic process	biological_process	0.090727	0.69242	140
GO:0006099	tricarboxylic acid cycle	biological_process	0.090996	0.69242	7
GO:1901136	carbohydrate derivative catabolic process	biological_process	0.09125	0.69242	62
GO:0017108	5'-flap endonuclease activity	molecular_function	0.09151	0.69242	2
GO:0033557	Slx1-Slx4 complex	cellular_component	0.09151	0.69242	2
GO:0048256	flap endonuclease activity	molecular_function	0.09151	0.69242	2
GO:0031323	regulation of cellular metabolic process	biological_process	0.09164	0.69242	588
GO:0009617	response to bacterium	biological_process	0.091713	0.69242	25
GO:0042742	defense response to bacterium	biological_process	0.091713	0.69242	25
GO:0006063	uronic acid metabolic process	biological_process	0.092259	0.69264	3
GO:0006064	glucuronate catabolic process	biological_process	0.092259	0.69264	3
GO:0019585	glucuronate metabolic process	biological_process	0.092259	0.69264	3
GO:0070469	respiratory chain	cellular_component	0.093088	0.69755	11
GO:0044429	mitochondrial part	cellular_component	0.093565	0.69789	97
GO:0007017	microtubule-based process	biological_process	0.093574	0.69789	55
GO:0033180	proton-transporting V-type ATPase, V1 domain	cellular_component	0.093656	0.69789	17
GO:0051130	positive regulation of cellular component organization	biological_process	0.094398	0.69986	6
GO:0000276	mitochondrial proton-transporting ATP synthase complex, coupling factor F(o)	cellular_component	0.094702	0.69986	31
GO:0008927	mannonate dehydratase activity	molecular_function	0.094703	0.69986	2
GO:0015988	energy coupled proton transmembrane transport, against electrochemical gradient	biological_process	0.094793	0.69986	58
GO:0015991	ATP hydrolysis coupled proton transport	biological_process	0.094793	0.69986	58
GO:0005402	cation:sugar symporter activity	molecular_function	0.095322	0.70176	14
GO:0006265	DNA topological change	biological_process	0.095496	0.70176	12
GO:0019843	rRNA binding	molecular_function	0.095946	0.70176	12
GO:0032101	regulation of response to external stimulus	biological_process	0.096181	0.70176	2
GO:0006606	protein import into nucleus	biological_process	0.096551	0.70176	19
GO:0034504	protein localization to nucleus	biological_process	0.096551	0.70176	19
GO:0044744	protein targeting to nucleus	biological_process	0.096551	0.70176	19
GO:0051170	nuclear import	biological_process	0.096551	0.70176	19
GO:0015293	symporter activity	molecular_function	0.097026	0.70176	20
GO:0015294	solute:cation symporter activity	molecular_function	0.097026	0.70176	20
GO:0045259	proton-transporting ATP synthase complex	cellular_component	0.097119	0.70176	45
GO:0019773	proteasome core complex, alpha-subunit complex	cellular_component	0.097193	0.70176	10
GO:0000012	single strand break repair	biological_process	0.097326	0.70176	2
GO:0005739	mitochondrion	cellular_component	0.098147	0.70641	111
GO:0008312	7S RNA binding	molecular_function	0.098573	0.70694	7
GO:0048500	signal recognition particle	cellular_component	0.098573	0.70694	7
GO:0044272	sulfur compound biosynthetic process	biological_process	0.099253	0.71055	24
GO:0007276	gamete generation	biological_process	0.10007	0.71513	9
GO:0044260	cellular macromolecule metabolic process	biological_process	0.10062	0.71674	1924
GO:0015718	monocarboxylic acid transport	biological_process	0.10073	0.71674	7
GO:0019203	carbohydrate phosphatase activity	molecular_function	0.10147	0.71674	7
GO:0050308	sugar-phosphatase activity	molecular_function	0.10147	0.71674	7
GO:0015995	chlorophyll biosynthetic process	biological_process	0.10179	0.71674	55
GO:0008831	dTDP-4-dehydrorhamnose reductase activity	molecular_function	0.10186	0.71674	26
GO:0004824	lysine-tRNA ligase activity	molecular_function	0.10223	0.71674	3
GO:0006430	lysyl-tRNA aminoacylation	biological_process	0.10223	0.71674	3
GO:1901681	sulfur compound binding	molecular_function	0.10335	0.71674	20
GO:0048870	cell motility	biological_process	0.10352	0.71674	26
GO:0051674	localization of cell	biological_process	0.10352	0.71674	26
GO:0006826	iron ion transport	biological_process	0.10397	0.71674	36
GO:0016413	O-acetyltransferase activity	molecular_function	0.10424	0.71674	8
GO:0005337	nucleoside transmembrane transporter activity	molecular_function	0.10492	0.71674	7
GO:0006334	nucleosome assembly	biological_process	0.10543	0.71674	13
GO:0031497	chromatin assembly	biological_process	0.10543	0.71674	13
GO:0034728	nucleosome organization	biological_process	0.10543	0.71674	13
GO:0005294	neutral L-amino acid secondary active transmembrane transporter activity	molecular_function	0.10573	0.71674	3
GO:0015175	neutral amino acid transmembrane transporter activity	molecular_function	0.10573	0.71674	3
GO:0015655	alanine:sodium symporter activity	molecular_function	0.10573	0.71674	3
GO:0015804	neutral amino acid transport	biological_process	0.10573	0.71674	3
GO:0022858	alanine transmembrane transporter activity	molecular_function	0.10573	0.71674	3
GO:0032328	alanine transport	biological_process	0.10573	0.71674	3
GO:0004109	coproporphyrinogen oxidase activity	molecular_function	0.10601	0.71674	2
GO:0046933	proton-transporting ATP synthase activity, rotational mechanism	molecular_function	0.10621	0.71674	9
GO:0030515	snoRNA binding	molecular_function	0.10641	0.71674	2
GO:0072588	box H/ACA RNP complex	cellular_component	0.10641	0.71674	2
GO:0080090	regulation of primary metabolic process	biological_process	0.10643	0.71674	569
GO:0006090	pyruvate metabolic process	biological_process	0.10651	0.71674	2
GO:0009240	isopentenyl diphosphate biosynthetic process	biological_process	0.10651	0.71674	2
GO:0019288	isopentenyl diphosphate biosynthetic process, mevalonate-independent pathway	biological_process	0.10651	0.71674	2
GO:0019682	glyceraldehyde-3-phosphate metabolic process	biological_process	0.10651	0.71674	2
GO:0046490	isopentenyl diphosphate metabolic process	biological_process	0.10651	0.71674	2
GO:0004476	mannose-6-phosphate isomerase activity	molecular_function	0.10666	0.71674	3
GO:0045333	cellular respiration	biological_process	0.10717	0.71674	42
GO:0000221	vacuolar proton-transporting V-type ATPase, V1 domain	cellular_component	0.10727	0.71674	16
GO:0005774	vacuolar membrane	cellular_component	0.10727	0.71674	16
GO:0016471	vacuolar proton-transporting V-type ATPase complex	cellular_component	0.10727	0.71674	16
GO:0044437	vacuolar part	cellular_component	0.10727	0.71674	16
GO:0005673	transcription factor TFIIE complex	cellular_component	0.10753	0.71691	2
GO:0016972	thiol oxidase activity	molecular_function	0.10765	0.71691	9
GO:0006364	rRNA processing	biological_process	0.10827	0.71696	33
GO:0016072	rRNA metabolic process	biological_process	0.10827	0.71696	33
GO:0051179	localization	biological_process	0.10831	0.71696	981
GO:0005525	GTP binding	molecular_function	0.10838	0.71696	193
GO:0016879	ligase activity, forming carbon-nitrogen bonds	molecular_function	0.1094	0.72065	170
GO:0072330	monocarboxylic acid biosynthetic process	biological_process	0.10942	0.72065	39
GO:0008716	D-alanine-D-alanine ligase activity	molecular_function	0.10957	0.72065	5
GO:0032561	guanyl ribonucleotide binding	molecular_function	0.10998	0.72065	194
GO:0046406	magnesium protoporphyrin IX methyltransferase activity	molecular_function	0.11032	0.72065	3
GO:0016042	lipid catabolic process	biological_process	0.11054	0.72065	22
GO:0043566	structure-specific DNA binding	molecular_function	0.1107	0.72065	31
GO:0006526	arginine biosynthetic process	biological_process	0.11097	0.72065	2
GO:0070838	divalent metal ion transport	biological_process	0.11121	0.72065	43
GO:0005834	heterotrimeric G-protein complex	cellular_component	0.11178	0.72065	5
GO:0019897	extrinsic to plasma membrane	cellular_component	0.11178	0.72065	5
GO:0031234	extrinsic to internal side of plasma membrane	cellular_component	0.11178	0.72065	5
GO:0030545	receptor regulator activity	molecular_function	0.11198	0.72065	4
GO:0030547	receptor inhibitor activity	molecular_function	0.11198	0.72065	4
GO:0030548	acetylcholine receptor regulator activity	molecular_function	0.11198	0.72065	4
GO:0030550	acetylcholine receptor inhibitor activity	molecular_function	0.11198	0.72065	4
GO:0004497	monooxygenase activity	molecular_function	0.11209	0.72065	25
GO:0061025	membrane fusion	biological_process	0.11233	0.72065	21
GO:0046034	ATP metabolic process	biological_process	0.11235	0.72065	50
GO:2000112	regulation of cellular macromolecule biosynthetic process	biological_process	0.11374	0.72304	538
GO:0019060	intracellular transport of viral proteins in host cell	biological_process	0.11375	0.72304	2
GO:0030581	symbiont intracellular protein transport in host	biological_process	0.11375	0.72304	2
GO:0046719	regulation by virus of viral protein levels in host cell	biological_process	0.11375	0.72304	2
GO:0051708	intracellular protein transport in other organism involved in symbiotic interaction	biological_process	0.11375	0.72304	2
GO:0044183	protein binding involved in protein folding	molecular_function	0.11392	0.72304	10
GO:0022891	substrate-specific transmembrane transporter activity	molecular_function	0.11398	0.72304	321
GO:0045502	dynein binding	molecular_function	0.11424	0.72353	23
GO:0004657	proline dehydrogenase activity	molecular_function	0.11486	0.724	2
GO:0006560	proline metabolic process	biological_process	0.11486	0.724	2
GO:0006562	proline catabolic process	biological_process	0.11486	0.724	2
GO:0019001	guanyl nucleotide binding	molecular_function	0.11612	0.72942	194
GO:0044781	bacterial-type flagellum organization	biological_process	0.11619	0.72942	6
GO:0004420	hydroxymethylglutaryl-CoA reductase (NADPH) activity	molecular_function	0.11637	0.72942	3
GO:0009020	tRNA (guanosine-2'-O-)-methyltransferase activity	molecular_function	0.11687	0.72942	2
GO:0010506	regulation of autophagy	biological_process	0.11701	0.72942	29
GO:0007010	cytoskeleton organization	biological_process	0.11702	0.72942	64
GO:0015979	photosynthesis	biological_process	0.11702	0.72942	116
GO:0016624	oxidoreductase activity, acting on the aldehyde or oxo group of donors, disulfide as acceptor	molecular_function	0.11748	0.72942	9
GO:0009607	response to biotic stimulus	biological_process	0.11805	0.72942	51
GO:0004970	ionotropic glutamate receptor activity	molecular_function	0.11808	0.72942	13
GO:0005231	excitatory extracellular ligand-gated ion channel activity	molecular_function	0.11808	0.72942	13
GO:0005234	extracellular-glutamate-gated ion channel activity	molecular_function	0.11808	0.72942	13
GO:0008066	glutamate receptor activity	molecular_function	0.11808	0.72942	13
GO:0016407	acetyltransferase activity	molecular_function	0.11899	0.73216	34
GO:0006413	translational initiation	biological_process	0.11916	0.73216	18
GO:0016625	oxidoreductase activity, acting on the aldehyde or oxo group of donors, iron-sulfur protein as acceptor	molecular_function	0.11925	0.73216	2
GO:0005740	mitochondrial envelope	cellular_component	0.11967	0.73216	91
GO:0044770	cell cycle phase transition	biological_process	0.1197	0.73216	12
GO:1901987	regulation of cell cycle phase transition	biological_process	0.1197	0.73216	12
GO:0032502	developmental process	biological_process	0.11988	0.73216	80
GO:0009889	regulation of biosynthetic process	biological_process	0.12044	0.73216	538
GO:0010556	regulation of macromolecule biosynthetic process	biological_process	0.12044	0.73216	538
GO:0031326	regulation of cellular biosynthetic process	biological_process	0.12044	0.73216	538
GO:0003743	translation initiation factor activity	molecular_function	0.12054	0.73216	22
GO:0044431	Golgi apparatus part	cellular_component	0.12229	0.74156	40
GO:0044767	single-organism developmental process	biological_process	0.12245	0.74156	39
GO:0030154	cell differentiation	biological_process	0.12269	0.74189	19
GO:0033014	tetrapyrrole biosynthetic process	biological_process	0.12312	0.74333	91
GO:0006370	7-methylguanosine mRNA capping	biological_process	0.12337	0.74374	7
GO:0006553	lysine metabolic process	biological_process	0.12382	0.74446	14
GO:0008324	cation transmembrane transporter activity	molecular_function	0.12386	0.74446	253
GO:0004645	phosphorylase activity	molecular_function	0.12496	0.74754	3
GO:0008184	glycogen phosphorylase activity	molecular_function	0.12496	0.74754	3
GO:0005876	spindle microtubule	cellular_component	0.125	0.74754	4
GO:0042254	ribosome biogenesis	biological_process	0.12512	0.74754	41
GO:0030291	protein serine/threonine kinase inhibitor activity	molecular_function	0.12541	0.74817	4
GO:0006269	DNA replication, synthesis of RNA primer	biological_process	0.12569	0.74861	5
GO:0000179	rRNA (adenine-N6,N6-)-dimethyltransferase activity	molecular_function	0.12586	0.74861	10
GO:0006812	cation transport	biological_process	0.12614	0.7492	268
GO:0043022	ribosome binding	molecular_function	0.12659	0.75072	5
GO:0033202	DNA helicase complex	cellular_component	0.12738	0.75431	4
GO:0016820	hydrolase activity, acting on acid anhydrides, catalyzing transmembrane movement of substances	molecular_function	0.1276	0.75447	63
GO:0017038	protein import	biological_process	0.12792	0.75518	28
GO:0030150	protein import into mitochondrial matrix	biological_process	0.12819	0.75518	4
GO:0006355	regulation of transcription, DNA-dependent	biological_process	0.12828	0.75518	529
GO:0005875	microtubule associated complex	cellular_component	0.12984	0.76002	7
GO:0042822	pyridoxal phosphate metabolic process	biological_process	0.12988	0.76002	2
GO:0042823	pyridoxal phosphate biosynthetic process	biological_process	0.12988	0.76002	2
GO:0016151	nickel cation binding	molecular_function	0.13025	0.76002	17
GO:0010468	regulation of gene expression	biological_process	0.13067	0.76002	552
GO:0065004	protein-DNA complex assembly	biological_process	0.13081	0.76002	22
GO:0071824	protein-DNA complex subunit organization	biological_process	0.13081	0.76002	22
GO:0008134	transcription factor binding	molecular_function	0.13083	0.76002	58
GO:0005549	odorant binding	molecular_function	0.13094	0.76002	4
GO:0007165	signal transduction	biological_process	0.13103	0.76002	356
GO:0006801	superoxide metabolic process	biological_process	0.13138	0.76002	5
GO:0072593	reactive oxygen species metabolic process	biological_process	0.13138	0.76002	5
GO:0031967	organelle envelope	cellular_component	0.13243	0.7641	115
GO:0004140	dephospho-CoA kinase activity	molecular_function	0.13246	0.7641	6
GO:0005794	Golgi apparatus	cellular_component	0.13309	0.76425	42
GO:0000042	protein targeting to Golgi	biological_process	0.13344	0.76425	4
GO:0000301	retrograde transport, vesicle recycling within Golgi	biological_process	0.13344	0.76425	4
GO:0034067	protein localization to Golgi apparatus	biological_process	0.13344	0.76425	4
GO:0072600	establishment of protein localization to Golgi	biological_process	0.13344	0.76425	4
GO:0005742	mitochondrial outer membrane translocase complex	cellular_component	0.13492	0.7712	5
GO:0006766	vitamin metabolic process	biological_process	0.13532	0.7712	31
GO:0006767	water-soluble vitamin metabolic process	biological_process	0.13532	0.7712	31
GO:0051252	regulation of RNA metabolic process	biological_process	0.13562	0.7712	529
GO:2001141	regulation of RNA biosynthetic process	biological_process	0.13562	0.7712	529
GO:0016903	oxidoreductase activity, acting on the aldehyde or oxo group of donors	molecular_function	0.13604	0.77144	34
GO:0019219	regulation of nucleobase-containing compound metabolic process	biological_process	0.13624	0.77144	555
GO:0051171	regulation of nitrogen compound metabolic process	biological_process	0.13624	0.77144	555
GO:0045263	proton-transporting ATP synthase complex, coupling factor F(o)	cellular_component	0.1377	0.77864	37
GO:0022613	ribonucleoprotein complex biogenesis	biological_process	0.13818	0.78022	42
GO:0016482	cytoplasmic transport	biological_process	0.13863	0.78166	70
GO:0006083	acetate metabolic process	biological_process	0.13961	0.78609	5
GO:0055085	transmembrane transport	biological_process	0.13994	0.78684	383
GO:0008965	phosphoenolpyruvate-protein phosphotransferase activity	molecular_function	0.14173	0.78701	3
GO:0045087	innate immune response	biological_process	0.14323	0.78701	3
GO:0031975	envelope	cellular_component	0.14325	0.78701	121
GO:0007088	regulation of mitosis	biological_process	0.14327	0.78701	7
GO:0007091	metaphase/anaphase transition of mitotic cell cycle	biological_process	0.14327	0.78701	7
GO:0007346	regulation of mitotic cell cycle	biological_process	0.14327	0.78701	7
GO:0030071	regulation of mitotic metaphase/anaphase transition	biological_process	0.14327	0.78701	7
GO:0044772	mitotic cell cycle phase transition	biological_process	0.14327	0.78701	7
GO:0044784	metaphase/anaphase transition of cell cycle	biological_process	0.14327	0.78701	7
GO:0051783	regulation of nuclear division	biological_process	0.14327	0.78701	7
GO:1901990	regulation of mitotic cell cycle phase transition	biological_process	0.14327	0.78701	7
GO:1902099	regulation of metaphase/anaphase transition of cell cycle	biological_process	0.14327	0.78701	7
GO:0015099	nickel cation transmembrane transporter activity	molecular_function	0.14343	0.78701	3
GO:0015675	nickel cation transport	biological_process	0.14343	0.78701	3
GO:0016226	iron-sulfur cluster assembly	biological_process	0.14343	0.78701	8
GO:0031163	metallo-sulfur cluster assembly	biological_process	0.14343	0.78701	8
GO:0042559	pteridine-containing compound biosynthetic process	biological_process	0.14352	0.78701	12
GO:0046131	pyrimidine ribonucleoside metabolic process	biological_process	0.14379	0.78701	9
GO:0001558	regulation of cell growth	biological_process	0.14409	0.78701	1
GO:0005520	insulin-like growth factor binding	molecular_function	0.14409	0.78701	1
GO:0019838	growth factor binding	molecular_function	0.14409	0.78701	1
GO:0006891	intra-Golgi vesicle-mediated transport	biological_process	0.14514	0.79163	17
GO:0044702	single organism reproductive process	biological_process	0.14553	0.79272	10
GO:0009401	phosphoenolpyruvate-dependent sugar phosphotransferase system	biological_process	0.14596	0.79396	12
GO:0019321	pentose metabolic process	biological_process	0.14662	0.79623	6
GO:0004984	olfactory receptor activity	molecular_function	0.14691	0.79623	3
GO:0072528	pyrimidine-containing compound biosynthetic process	biological_process	0.14697	0.79623	21
GO:0000041	transition metal ion transport	biological_process	0.14737	0.7973	44
GO:0060255	regulation of macromolecule metabolic process	biological_process	0.14777	0.79841	558
GO:0005976	polysaccharide metabolic process	biological_process	0.14911	0.80161	150
GO:0033178	proton-transporting two-sector ATPase complex, catalytic domain	cellular_component	0.14916	0.80161	29
GO:0016851	magnesium chelatase activity	molecular_function	0.14944	0.80161	52
GO:0051002	ligase activity, forming nitrogen-metal bonds	molecular_function	0.14944	0.80161	52
GO:0051003	ligase activity, forming nitrogen-metal bonds, forming coordination complexes	molecular_function	0.14944	0.80161	52
GO:0009896	positive regulation of catabolic process	biological_process	0.14996	0.80161	27
GO:0010508	positive regulation of autophagy	biological_process	0.14996	0.80161	27
GO:0031331	positive regulation of cellular catabolic process	biological_process	0.14996	0.80161	27
GO:0003972	RNA ligase (ATP) activity	molecular_function	0.1507	0.80342	3
GO:0008452	RNA ligase activity	molecular_function	0.1507	0.80342	3
GO:0070566	adenylyltransferase activity	molecular_function	0.15114	0.8044	13
GO:0004649	poly(ADP-ribose) glycohydrolase activity	molecular_function	0.15142	0.8044	2
GO:0016301	kinase activity	molecular_function	0.15177	0.8044	550
GO:0000139	Golgi membrane	cellular_component	0.15183	0.8044	27
GO:0051119	sugar transmembrane transporter activity	molecular_function	0.15189	0.8044	14
GO:0023052	signaling	biological_process	0.1524	0.80499	357
GO:0044700	single organism signaling	biological_process	0.1524	0.80499	357
GO:0031982	vesicle	cellular_component	0.15324	0.80756	26
GO:0016044	cellular membrane organization	biological_process	0.15329	0.80756	19
GO:0031329	regulation of cellular catabolic process	biological_process	0.1541	0.80967	51
GO:0006448	regulation of translational elongation	biological_process	0.15437	0.80967	4
GO:0016860	intramolecular oxidoreductase activity	molecular_function	0.15499	0.80967	17
GO:0019829	cation-transporting ATPase activity	molecular_function	0.15519	0.80967	22
GO:0042625	ATPase activity, coupled to transmembrane movement of ions	molecular_function	0.15519	0.80967	22
GO:0019008	molybdopterin synthase complex	cellular_component	0.15569	0.80967	3
GO:0000152	nuclear ubiquitin ligase complex	cellular_component	0.15573	0.80967	82
GO:0005680	anaphase-promoting complex	cellular_component	0.15573	0.80967	82
GO:0016854	racemase and epimerase activity	molecular_function	0.15583	0.80967	9
GO:0009110	vitamin biosynthetic process	biological_process	0.15595	0.80967	30
GO:0042364	water-soluble vitamin biosynthetic process	biological_process	0.15595	0.80967	30
GO:0042132	fructose 1,6-bisphosphate 1-phosphatase activity	molecular_function	0.15612	0.80967	5
GO:0031410	cytoplasmic vesicle	cellular_component	0.15635	0.80985	25
GO:0044463	cell projection part	cellular_component	0.15657	0.80992	8
GO:0000502	proteasome complex	cellular_component	0.15701	0.81113	16
GO:0006665	sphingolipid metabolic process	biological_process	0.15806	0.81551	7
GO:0010035	response to inorganic substance	biological_process	0.15912	0.81995	9
GO:0016881	acid-amino acid ligase activity	molecular_function	0.15982	0.82249	147
GO:0006783	heme biosynthetic process	biological_process	0.1606	0.82303	21
GO:0015937	coenzyme A biosynthetic process	biological_process	0.16095	0.82303	7
GO:0033866	nucleoside bisphosphate biosynthetic process	biological_process	0.16095	0.82303	7
GO:0034030	ribonucleoside bisphosphate biosynthetic process	biological_process	0.16095	0.82303	7
GO:0034033	purine nucleoside bisphosphate biosynthetic process	biological_process	0.16095	0.82303	7
GO:0044769	ATPase activity, coupled to transmembrane movement of ions, rotational mechanism	molecular_function	0.1613	0.82376	20
GO:0008483	transaminase activity	molecular_function	0.16187	0.82459	7
GO:0016769	transferase activity, transferring nitrogenous groups	molecular_function	0.16187	0.82459	7
GO:0016021	integral to membrane	cellular_component	0.16294	0.82896	665
GO:0004315	3-oxoacyl-[acyl-carrier-protein] synthase activity	molecular_function	0.1633	0.82906	15
GO:0006352	DNA-dependent transcription, initiation	biological_process	0.16337	0.82906	44
GO:0005773	vacuole	cellular_component	0.16433	0.83287	16
GO:0051539	4 iron, 4 sulfur cluster binding	molecular_function	0.1651	0.83512	8
GO:0006415	translational termination	biological_process	0.16549	0.83512	7
GO:0043624	cellular protein complex disassembly	biological_process	0.16549	0.83512	7
GO:2001070	starch binding	molecular_function	0.16561	0.83512	5
GO:0016051	carbohydrate biosynthetic process	biological_process	0.16589	0.83551	156
GO:0016272	prefoldin complex	cellular_component	0.1669	0.83907	13
GO:0051726	regulation of cell cycle	biological_process	0.16702	0.83907	23
GO:0006914	autophagy	biological_process	0.16778	0.84135	54
GO:0034062	RNA polymerase activity	molecular_function	0.16789	0.84135	81
GO:0016706	oxidoreductase activity, acting on paired donors, with incorporation or reduction of molecular oxygen, 2-oxoglutarate as one donor, and incorporation of one atom each of oxygen into both donors	molecular_function	0.16816	0.84164	64
GO:0030258	lipid modification	biological_process	0.16873	0.84176	42
GO:0003873	6-phosphofructo-2-kinase activity	molecular_function	0.16881	0.84176	6
GO:0006000	fructose metabolic process	biological_process	0.16881	0.84176	6
GO:0015980	energy derivation by oxidation of organic compounds	biological_process	0.17031	0.84647	49
GO:0042558	pteridine-containing compound metabolic process	biological_process	0.17035	0.84647	13
GO:0031224	intrinsic to membrane	cellular_component	0.17039	0.84647	677
GO:0005985	sucrose metabolic process	biological_process	0.1707	0.84693	8
GO:0044432	endoplasmic reticulum part	cellular_component	0.17091	0.84693	36
GO:0010038	response to metal ion	biological_process	0.17161	0.84936	6
GO:0007600	sensory perception	biological_process	0.17205	0.85016	10
GO:0015075	ion transmembrane transporter activity	molecular_function	0.1722	0.85016	301
GO:0051707	response to other organism	biological_process	0.17295	0.85285	31
GO:0006308	DNA catabolic process	biological_process	0.17362	0.85492	5
GO:0004372	glycine hydroxymethyltransferase activity	molecular_function	0.1738	0.85492	4
GO:0009318	exodeoxyribonuclease VII complex	cellular_component	0.17453	0.85589	3
GO:0006824	cobalt ion transport	biological_process	0.17484	0.85589	4
GO:0015087	cobalt ion transmembrane transporter activity	molecular_function	0.17484	0.85589	4
GO:0019201	nucleotide kinase activity	molecular_function	0.17485	0.85589	6
GO:0009289	pilus	cellular_component	0.17567	0.85724	3
GO:0000151	ubiquitin ligase complex	cellular_component	0.17581	0.85724	117
GO:0022884	macromolecule transmembrane transporter activity	molecular_function	0.17582	0.85724	8
GO:0004478	methionine adenosyltransferase activity	molecular_function	0.17641	0.85724	4
GO:0006556	S-adenosylmethionine biosynthetic process	biological_process	0.17641	0.85724	4
GO:0046500	S-adenosylmethionine metabolic process	biological_process	0.17641	0.85724	4
GO:0004820	glycine-tRNA ligase activity	molecular_function	0.17885	0.86087	3
GO:0006426	glycyl-tRNA aminoacylation	biological_process	0.17885	0.86087	3
GO:0009581	detection of external stimulus	biological_process	0.17897	0.86087	4
GO:0009582	detection of abiotic stimulus	biological_process	0.17897	0.86087	4
GO:0009583	detection of light stimulus	biological_process	0.17897	0.86087	4
GO:0009584	detection of visible light	biological_process	0.17897	0.86087	4
GO:0018298	protein-chromophore linkage	biological_process	0.17897	0.86087	4
GO:0051606	detection of stimulus	biological_process	0.17897	0.86087	4
GO:0005874	microtubule	cellular_component	0.17962	0.86087	8
GO:0016311	dephosphorylation	biological_process	0.18072	0.86087	18
GO:0016070	RNA metabolic process	biological_process	0.18119	0.86087	848
GO:0018142	protein-DNA covalent cross-linking	biological_process	0.18169	0.86087	2
GO:0042624	ATPase activity, uncoupled	molecular_function	0.18169	0.86087	2
GO:0048523	negative regulation of cellular process	biological_process	0.18178	0.86087	34
GO:0016776	phosphotransferase activity, phosphate group as acceptor	molecular_function	0.18205	0.86087	8
GO:0033179	proton-transporting V-type ATPase, V0 domain	cellular_component	0.18222	0.86087	31
GO:0022857	transmembrane transporter activity	molecular_function	0.18264	0.86087	417
GO:0030029	actin filament-based process	biological_process	0.18375	0.86087	13
GO:0030036	actin cytoskeleton organization	biological_process	0.18375	0.86087	13
GO:0019030	icosahedral viral capsid	cellular_component	0.18375	0.86087	1
GO:0039624	viral outer capsid	cellular_component	0.18375	0.86087	1
GO:0006575	cellular modified amino acid metabolic process	biological_process	0.1839	0.86087	23
GO:0004222	metalloendopeptidase activity	molecular_function	0.18407	0.86087	32
GO:0009894	regulation of catabolic process	biological_process	0.18447	0.86087	51
GO:0015708	silicate transport	biological_process	0.18455	0.86087	2
GO:0000045	autophagic vacuole assembly	biological_process	0.18461	0.86087	4
GO:0007033	vacuole organization	biological_process	0.18461	0.86087	4
GO:0016236	macroautophagy	biological_process	0.18461	0.86087	4
GO:0031461	cullin-RING ubiquitin ligase complex	cellular_component	0.18471	0.86087	88
GO:0009888	tissue development	biological_process	0.18472	0.86087	9
GO:0019888	protein phosphatase regulator activity	molecular_function	0.18502	0.86087	9
GO:0005869	dynactin complex	cellular_component	0.18637	0.86087	2
GO:0004611	phosphoenolpyruvate carboxykinase activity	molecular_function	0.1872	0.86087	7
GO:0016011	dystroglycan complex	cellular_component	0.18771	0.86087	5
GO:0016012	sarcoglycan complex	cellular_component	0.18771	0.86087	5
GO:0000394	RNA splicing, via endonucleolytic cleavage and ligation	biological_process	0.18866	0.86087	6
GO:0006388	tRNA splicing, via endonucleolytic cleavage and ligation	biological_process	0.18866	0.86087	6
GO:0006996	organelle organization	biological_process	0.18875	0.86087	183
GO:0016872	intramolecular lyase activity	molecular_function	0.18937	0.86087	6
GO:0034599	cellular response to oxidative stress	biological_process	0.18986	0.86087	2
GO:0044433	cytoplasmic vesicle part	cellular_component	0.19035	0.86087	22
GO:0016671	oxidoreductase activity, acting on a sulfur group of donors, disulfide as acceptor	molecular_function	0.19084	0.86087	6
GO:0004329	formate-tetrahydrofolate ligase activity	molecular_function	0.19099	0.86087	2
GO:1901505	carbohydrate derivative transporter activity	molecular_function	0.19203	0.86087	8
GO:0004176	ATP-dependent peptidase activity	molecular_function	0.19205	0.86087	5
GO:0006810	transport	biological_process	0.19263	0.86087	947
GO:0051234	establishment of localization	biological_process	0.19263	0.86087	947
GO:0031099	regeneration	biological_process	0.19281	0.86087	7
GO:0042246	tissue regeneration	biological_process	0.19281	0.86087	7
GO:0048589	developmental growth	biological_process	0.19281	0.86087	7
GO:0046058	cAMP metabolic process	biological_process	0.19299	0.86087	3
GO:0004888	transmembrane signaling receptor activity	molecular_function	0.19309	0.86087	37
GO:0042626	ATPase activity, coupled to transmembrane movement of substances	molecular_function	0.1931	0.86087	49
GO:0043492	ATPase activity, coupled to movement of substances	molecular_function	0.1931	0.86087	49
GO:0000165	MAPK cascade	biological_process	0.19331	0.86087	1
GO:0000186	activation of MAPKK activity	biological_process	0.19331	0.86087	1
GO:0001678	cellular glucose homeostasis	biological_process	0.19331	0.86087	1
GO:0008343	adult feeding behavior	biological_process	0.19331	0.86087	1
GO:0030534	adult behavior	biological_process	0.19331	0.86087	1
GO:0032094	response to food	biological_process	0.19331	0.86087	1
GO:0032095	regulation of response to food	biological_process	0.19331	0.86087	1
GO:0032096	negative regulation of response to food	biological_process	0.19331	0.86087	1
GO:0032098	regulation of appetite	biological_process	0.19331	0.86087	1
GO:0032099	negative regulation of appetite	biological_process	0.19331	0.86087	1
GO:0032102	negative regulation of response to external stimulus	biological_process	0.19331	0.86087	1
GO:0032104	regulation of response to extracellular stimulus	biological_process	0.19331	0.86087	1
GO:0032105	negative regulation of response to extracellular stimulus	biological_process	0.19331	0.86087	1
GO:0032107	regulation of response to nutrient levels	biological_process	0.19331	0.86087	1
GO:0032108	negative regulation of response to nutrient levels	biological_process	0.19331	0.86087	1
GO:0032147	activation of protein kinase activity	biological_process	0.19331	0.86087	1
GO:0033500	carbohydrate homeostasis	biological_process	0.19331	0.86087	1
GO:0033674	positive regulation of kinase activity	biological_process	0.19331	0.86087	1
GO:0042593	glucose homeostasis	biological_process	0.19331	0.86087	1
GO:0043408	regulation of MAPK cascade	biological_process	0.19331	0.86087	1
GO:0045860	positive regulation of protein kinase activity	biological_process	0.19331	0.86087	1
GO:0016855	racemase and epimerase activity, acting on amino acids and derivatives	molecular_function	0.19369	0.86087	3
GO:0036361	racemase activity, acting on amino acids and derivatives	molecular_function	0.19369	0.86087	3
GO:0006284	base-excision repair	biological_process	0.19658	0.87275	10
GO:0004312	fatty acid synthase activity	molecular_function	0.19703	0.8738	15
GO:0032182	small conjugating protein binding	molecular_function	0.19822	0.87709	3
GO:0043130	ubiquitin binding	molecular_function	0.19822	0.87709	3
GO:0009055	electron carrier activity	molecular_function	0.19889	0.87829	66
GO:0000154	rRNA modification	biological_process	0.19974	0.87829	15
GO:0006771	riboflavin metabolic process	biological_process	0.1998	0.87829	10
GO:0009231	riboflavin biosynthetic process	biological_process	0.1998	0.87829	10
GO:0042726	flavin-containing compound metabolic process	biological_process	0.1998	0.87829	10
GO:0042727	flavin-containing compound biosynthetic process	biological_process	0.1998	0.87829	10
GO:0044708	single-organism behavior	biological_process	0.2009	0.88215	2
GO:0042168	heme metabolic process	biological_process	0.20139	0.88253	22
GO:0004640	phosphoribosylanthranilate isomerase activity	molecular_function	0.20147	0.88253	2
GO:0043233	organelle lumen	cellular_component	0.20247	0.88253	104
GO:0070013	intracellular organelle lumen	cellular_component	0.20247	0.88253	104
GO:0006558	L-phenylalanine metabolic process	biological_process	0.20249	0.88253	4
GO:1902221	erythrose 4-phosphate/phosphoenolpyruvate family amino acid metabolic process	biological_process	0.20249	0.88253	4
GO:0019222	regulation of metabolic process	biological_process	0.20253	0.88253	630
GO:0016846	carbon-sulfur lyase activity	molecular_function	0.203	0.88361	11
GO:0016833	oxo-acid-lyase activity	molecular_function	0.20362	0.88524	3
GO:0018342	protein prenylation	biological_process	0.20436	0.88524	5
GO:0097354	prenylation	biological_process	0.20436	0.88524	5
GO:0006333	chromatin assembly or disassembly	biological_process	0.20455	0.88524	13
GO:0009085	lysine biosynthetic process	biological_process	0.20497	0.88524	11
GO:0009089	lysine biosynthetic process via diaminopimelate	biological_process	0.20497	0.88524	11
GO:0046451	diaminopimelate metabolic process	biological_process	0.20497	0.88524	11
GO:0006405	RNA export from nucleus	biological_process	0.20536	0.88524	6
GO:0051168	nuclear export	biological_process	0.20536	0.88524	6
GO:0005283	sodium:amino acid symporter activity	molecular_function	0.20642	0.88597	3
GO:0005416	cation:amino acid symporter activity	molecular_function	0.20642	0.88597	3
GO:0042398	cellular modified amino acid biosynthetic process	biological_process	0.20662	0.88597	20
GO:0004017	adenylate kinase activity	molecular_function	0.20686	0.88597	5
GO:0009690	cytokinin metabolic process	biological_process	0.20801	0.88597	5
GO:0010817	regulation of hormone levels	biological_process	0.20801	0.88597	5
GO:0019139	cytokinin dehydrogenase activity	molecular_function	0.20801	0.88597	5
GO:0034754	cellular hormone metabolic process	biological_process	0.20801	0.88597	5
GO:0042445	hormone metabolic process	biological_process	0.20801	0.88597	5
GO:0030118	clathrin coat	cellular_component	0.20814	0.88597	15
GO:0005578	proteinaceous extracellular matrix	cellular_component	0.20833	0.88597	47
GO:0015629	actin cytoskeleton	cellular_component	0.20837	0.88597	24
GO:0016742	hydroxymethyl-, formyl- and related transferase activity	molecular_function	0.2084	0.88597	7
GO:0009060	aerobic respiration	biological_process	0.20919	0.88841	8
GO:0032505	reproduction of a single-celled organism	biological_process	0.20968	0.88859	19
GO:0043093	cytokinesis by binary fission	biological_process	0.20968	0.88859	19
GO:0006406	mRNA export from nucleus	biological_process	0.21082	0.89247	5
GO:0071806	protein transmembrane transport	biological_process	0.2114	0.89401	8
GO:0051028	mRNA transport	biological_process	0.21179	0.89472	6
GO:0044264	cellular polysaccharide metabolic process	biological_process	0.21319	0.89957	141
GO:0006760	folic acid-containing compound metabolic process	biological_process	0.21339	0.89957	11
GO:0032504	multicellular organism reproduction	biological_process	0.21407	0.90037	10
GO:0048609	multicellular organismal reproductive process	biological_process	0.21407	0.90037	10
GO:0019205	nucleobase-containing compound kinase activity	molecular_function	0.21426	0.90037	13
GO:0019073	viral DNA genome packaging	biological_process	0.21481	0.90175	2
GO:0000030	mannosyltransferase activity	molecular_function	0.21554	0.90389	1
GO:0034357	photosynthetic membrane	cellular_component	0.21707	0.90933	57
GO:0016705	oxidoreductase activity, acting on paired donors, with incorporation or reduction of molecular oxygen	molecular_function	0.21798	0.91219	195
GO:0051128	regulation of cellular component organization	biological_process	0.21821	0.9122	19
GO:0007623	circadian rhythm	biological_process	0.21912	0.91506	2
GO:0033043	regulation of organelle organization	biological_process	0.21936	0.91511	11
GO:0019842	vitamin binding	molecular_function	0.22008	0.91711	17
GO:0043047	single-stranded telomeric DNA binding	molecular_function	0.22037	0.91711	1
GO:0008964	phosphoenolpyruvate carboxylase activity	molecular_function	0.22053	0.91711	4
GO:0033218	amide binding	molecular_function	0.22086	0.91734	10
GO:0016861	intramolecular oxidoreductase activity, interconverting aldoses and ketoses	molecular_function	0.22104	0.91734	14
GO:0008104	protein localization	biological_process	0.22142	0.91795	280
GO:0009396	folic acid-containing compound biosynthetic process	biological_process	0.2226	0.92189	10
GO:0008113	peptide-methionine (S)-S-oxide reductase activity	molecular_function	0.22537	0.93153	3
GO:0016410	N-acyltransferase activity	molecular_function	0.22561	0.93153	28
GO:0046132	pyrimidine ribonucleoside biosynthetic process	biological_process	0.22585	0.93153	8
GO:0046134	pyrimidine nucleoside biosynthetic process	biological_process	0.22585	0.93153	8
GO:0044428	nuclear part	cellular_component	0.22786	0.93463	215
GO:0061024	membrane organization	biological_process	0.22885	0.93463	29
GO:0010393	galacturonan metabolic process	biological_process	0.22909	0.93463	2
GO:0045488	pectin metabolic process	biological_process	0.22909	0.93463	2
GO:0045490	pectin catabolic process	biological_process	0.22909	0.93463	2
GO:0047487	oligogalacturonide lyase activity	molecular_function	0.22909	0.93463	2
GO:0004764	shikimate 3-dehydrogenase (NADP+) activity	molecular_function	0.22946	0.93463	4
GO:0017119	Golgi transport complex	cellular_component	0.22972	0.93463	11
GO:0005643	nuclear pore	cellular_component	0.2299	0.93463	24
GO:0046930	pore complex	cellular_component	0.2299	0.93463	24
GO:0007127	meiosis I	biological_process	0.23008	0.93463	10
GO:0009125	nucleoside monophosphate catabolic process	biological_process	0.2301	0.93463	1
GO:0009159	deoxyribonucleoside monophosphate catabolic process	biological_process	0.2301	0.93463	1
GO:0050144	nucleoside deoxyribosyltransferase activity	molecular_function	0.2301	0.93463	1
GO:0070694	deoxyribonucleoside 5'-monophosphate N-glycosidase activity	molecular_function	0.2301	0.93463	1
GO:0005667	transcription factor complex	cellular_component	0.23177	0.94044	19
GO:0016812	hydrolase activity, acting on carbon-nitrogen (but not peptide) bonds, in cyclic amides	molecular_function	0.23297	0.94347	1
GO:0004749	ribose phosphate diphosphokinase activity	molecular_function	0.23298	0.94347	3
GO:0009086	methionine biosynthetic process	biological_process	0.23366	0.94524	5
GO:0051213	dioxygenase activity	molecular_function	0.23407	0.94596	81
GO:0033615	mitochondrial proton-transporting ATP synthase complex assembly	biological_process	0.23519	0.94851	1
GO:0006644	phospholipid metabolic process	biological_process	0.23617	0.94851	58
GO:0009064	glutamine family amino acid metabolic process	biological_process	0.23645	0.94851	19
GO:0008661	1-deoxy-D-xylulose-5-phosphate synthase activity	molecular_function	0.23651	0.94851	7
GO:0016744	transferase activity, transferring aldehyde or ketonic groups	molecular_function	0.23651	0.94851	7
GO:0004864	protein phosphatase inhibitor activity	molecular_function	0.23663	0.94851	4
GO:0019212	phosphatase inhibitor activity	molecular_function	0.23663	0.94851	4
GO:0003871	5-methyltetrahydropteroyltriglutamate-homocysteine S-methyltransferase activity	molecular_function	0.23683	0.94851	2
GO:0042085	5-methyltetrahydropteroyltri-L-glutamate-dependent methyltransferase activity	molecular_function	0.23683	0.94851	2
GO:0000910	cytokinesis	biological_process	0.23751	0.94947	26
GO:0009425	bacterial-type flagellum basal body	cellular_component	0.23767	0.94947	4
GO:0004871	signal transducer activity	molecular_function	0.23802	0.94947	121
GO:0060089	molecular transducer activity	molecular_function	0.23802	0.94947	121
GO:0016646	oxidoreductase activity, acting on the CH-NH group of donors, NAD or NADP as acceptor	molecular_function	0.23929	0.95263	11
GO:0006140	regulation of nucleotide metabolic process	biological_process	0.23953	0.95263	26
GO:0008658	penicillin binding	molecular_function	0.24007	0.95263	5
GO:0033293	monocarboxylic acid binding	molecular_function	0.24007	0.95263	5
GO:0045227	capsule polysaccharide biosynthetic process	biological_process	0.24024	0.95263	2
GO:0045230	capsule organization	biological_process	0.24024	0.95263	2
GO:0044423	virion part	cellular_component	0.24202	0.95874	130
GO:0072594	establishment of protein localization to organelle	biological_process	0.2426	0.96011	37
GO:0044461	bacterial-type flagellum part	cellular_component	0.24367	0.9621	7
GO:0000096	sulfur amino acid metabolic process	biological_process	0.24426	0.9621	11
GO:0044262	cellular carbohydrate metabolic process	biological_process	0.2444	0.9621	167
GO:0009187	cyclic nucleotide metabolic process	biological_process	0.24509	0.9621	6
GO:0007530	sex determination	biological_process	0.24544	0.9621	2
GO:0007531	mating type determination	biological_process	0.24544	0.9621	2
GO:0007532	regulation of mating-type specific transcription, DNA-dependent	biological_process	0.24544	0.9621	2
GO:0045165	cell fate commitment	biological_process	0.24544	0.9621	2
GO:0045895	positive regulation of mating-type specific transcription, DNA-dependent	biological_process	0.24544	0.9621	2
GO:0019238	cyclohydrolase activity	molecular_function	0.24555	0.9621	6
GO:0032268	regulation of cellular protein metabolic process	biological_process	0.24607	0.9621	11
GO:0005634	nucleus	cellular_component	0.24624	0.9621	575
GO:0044780	bacterial-type flagellum assembly	biological_process	0.2465	0.9621	5
GO:0016778	diphosphotransferase activity	molecular_function	0.24667	0.9621	6
GO:0050877	neurological system process	biological_process	0.2467	0.9621	11
GO:0005751	mitochondrial respiratory chain complex IV	cellular_component	0.24809	0.96561	2
GO:0045277	respiratory chain complex IV	cellular_component	0.24809	0.96561	2
GO:0016645	oxidoreductase activity, acting on the CH-NH group of donors	molecular_function	0.24871	0.96711	19
GO:0005746	mitochondrial respiratory chain	cellular_component	0.24959	0.96905	9
GO:0019566	arabinose metabolic process	biological_process	0.25018	0.96905	4
GO:0046373	L-arabinose metabolic process	biological_process	0.25018	0.96905	4
GO:0046556	alpha-N-arabinofuranosidase activity	molecular_function	0.25018	0.96905	4
GO:0009288	bacterial-type flagellum	cellular_component	0.25063	0.96985	11
GO:0009523	photosystem II	cellular_component	0.25226	0.97345	32
GO:0008852	exodeoxyribonuclease I activity	molecular_function	0.25226	0.97345	1
GO:0006077	(1->6)-beta-D-glucan metabolic process	biological_process	0.25253	0.97345	2
GO:0006078	(1->6)-beta-D-glucan biosynthetic process	biological_process	0.25253	0.97345	2
GO:0008982	protein-N(PI)-phosphohistidine-sugar phosphotransferase activity	molecular_function	0.25403	0.97473	6
GO:0003684	damaged DNA binding	molecular_function	0.25417	0.97473	14
GO:0007029	endoplasmic reticulum organization	biological_process	0.25471	0.97473	2
GO:0007154	cell communication	biological_process	0.25476	0.97473	385
GO:0034613	cellular protein localization	biological_process	0.25548	0.97473	236
GO:0070727	cellular macromolecule localization	biological_process	0.25548	0.97473	236
GO:0009267	cellular response to starvation	biological_process	0.25596	0.97473	5
GO:0031667	response to nutrient levels	biological_process	0.25596	0.97473	5
GO:0031669	cellular response to nutrient levels	biological_process	0.25596	0.97473	5
GO:0042594	response to starvation	biological_process	0.25596	0.97473	5
GO:0000148	1,3-beta-D-glucan synthase complex	cellular_component	0.25661	0.97473	5
GO:0003843	1,3-beta-D-glucan synthase activity	molecular_function	0.25661	0.97473	5
GO:0006074	(1->3)-beta-D-glucan metabolic process	biological_process	0.25661	0.97473	5
GO:0006075	(1->3)-beta-D-glucan biosynthetic process	biological_process	0.25661	0.97473	5
GO:0019207	kinase regulator activity	molecular_function	0.25675	0.97473	9
GO:0019887	protein kinase regulator activity	molecular_function	0.25675	0.97473	9
GO:0005921	gap junction	cellular_component	0.25775	0.97574	3
GO:0000990	core RNA polymerase binding transcription factor activity	molecular_function	0.25857	0.97574	18
GO:0000996	core DNA-dependent RNA polymerase binding promoter specificity activity	molecular_function	0.25857	0.97574	18
GO:0016987	sigma factor activity	molecular_function	0.25857	0.97574	18
GO:0006081	cellular aldehyde metabolic process	biological_process	0.25858	0.97574	3
GO:0019208	phosphatase regulator activity	molecular_function	0.25909	0.97574	9
GO:0006109	regulation of carbohydrate metabolic process	biological_process	0.25934	0.97574	6
GO:0008770	[acyl-carrier-protein] phosphodiesterase activity	molecular_function	0.26	0.97574	2
GO:0044766	multi-organism transport	biological_process	0.26007	0.97574	3
GO:0009579	thylakoid	cellular_component	0.26029	0.97574	61
GO:0044436	thylakoid part	cellular_component	0.26029	0.97574	61
GO:0006813	potassium ion transport	biological_process	0.26034	0.97574	36
GO:0042221	response to chemical stimulus	biological_process	0.26062	0.97574	71
GO:0009073	aromatic amino acid family biosynthetic process	biological_process	0.26064	0.97574	9
GO:0044085	cellular component biogenesis	biological_process	0.26083	0.97574	174
GO:0016628	oxidoreductase activity, acting on the CH-CH group of donors, NAD or NADP as acceptor	molecular_function	0.26152	0.97574	28
GO:0044459	plasma membrane part	cellular_component	0.26204	0.97574	28
GO:0019538	protein metabolic process	biological_process	0.26221	0.97574	1115
GO:0032934	sterol binding	molecular_function	0.26273	0.97574	1
GO:0043178	alcohol binding	molecular_function	0.26273	0.97574	1
GO:0000724	double-strand break repair via homologous recombination	biological_process	0.26355	0.97574	2
GO:0000725	recombinational repair	biological_process	0.26355	0.97574	2
GO:0050829	defense response to Gram-negative bacterium	biological_process	0.2643	0.97574	3
GO:0004126	cytidine deaminase activity	molecular_function	0.26452	0.97574	1
GO:0006216	cytidine catabolic process	biological_process	0.26452	0.97574	1
GO:0009972	cytidine deamination	biological_process	0.26452	0.97574	1
GO:0046087	cytidine metabolic process	biological_process	0.26452	0.97574	1
GO:0046133	pyrimidine ribonucleoside catabolic process	biological_process	0.26452	0.97574	1
GO:0046135	pyrimidine nucleoside catabolic process	biological_process	0.26452	0.97574	1
GO:0072529	pyrimidine-containing compound catabolic process	biological_process	0.26452	0.97574	1
GO:0006555	methionine metabolic process	biological_process	0.26457	0.97574	6
GO:0003919	FMN adenylyltransferase activity	molecular_function	0.2648	0.97574	3
GO:0000103	sulfate assimilation	biological_process	0.26554	0.97664	14
GO:0004020	adenylylsulfate kinase activity	molecular_function	0.26554	0.97664	14
GO:0003906	DNA-(apurinic or apyrimidinic site) lyase activity	molecular_function	0.26611	0.97739	3
GO:0016310	phosphorylation	biological_process	0.26623	0.97739	420
GO:0000790	nuclear chromatin	cellular_component	0.26751	0.9785	2
GO:0031011	Ino80 complex	cellular_component	0.26751	0.9785	2
GO:0070603	SWI/SNF superfamily-type complex	cellular_component	0.26751	0.9785	2
GO:0097346	INO80-type complex	cellular_component	0.26751	0.9785	2
GO:0016977	chitosanase activity	molecular_function	0.26817	0.97927	1
GO:0004152	dihydroorotate dehydrogenase activity	molecular_function	0.26894	0.97927	5
GO:0006222	UMP biosynthetic process	biological_process	0.26894	0.97927	5
GO:0016635	oxidoreductase activity, acting on the CH-CH group of donors, quinone or related compound as acceptor	molecular_function	0.26894	0.97927	5
GO:0046049	UMP metabolic process	biological_process	0.26894	0.97927	5
GO:0043604	amide biosynthetic process	biological_process	0.26933	0.97982	13
GO:0046961	proton-transporting ATPase activity, rotational mechanism	molecular_function	0.26961	0.97993	17
GO:0006359	regulation of transcription from RNA polymerase III promoter	biological_process	0.27123	0.98405	1
GO:0016480	negative regulation of transcription from RNA polymerase III promoter	biological_process	0.27123	0.98405	1
GO:0016433	rRNA (adenine) methyltransferase activity	molecular_function	0.27169	0.98481	10
GO:0046917	triphosphoribosyl-dephospho-CoA synthase activity	molecular_function	0.27229	0.98608	1
GO:0001948	glycoprotein binding	molecular_function	0.27332	0.98717	1
GO:0043394	proteoglycan binding	molecular_function	0.27332	0.98717	1
GO:0043395	heparan sulfate proteoglycan binding	molecular_function	0.27332	0.98717	1
GO:0015977	carbon fixation	biological_process	0.27388	0.98829	5
GO:0019012	virion	cellular_component	0.27513	0.98862	140
GO:0046488	phosphatidylinositol metabolic process	biological_process	0.27524	0.98862	47
GO:0006554	lysine catabolic process	biological_process	0.27583	0.98862	3
GO:0009068	aspartate family amino acid catabolic process	biological_process	0.27583	0.98862	3
GO:0019475	L-lysine catabolic process to acetate	biological_process	0.27583	0.98862	3
GO:0019477	L-lysine catabolic process	biological_process	0.27583	0.98862	3
GO:0046440	L-lysine metabolic process	biological_process	0.27583	0.98862	3
GO:0001671	ATPase activator activity	molecular_function	0.27594	0.98862	1
GO:0031012	extracellular matrix	cellular_component	0.27668	0.98934	48
GO:0009379	Holliday junction helicase complex	cellular_component	0.27704	0.98934	2
GO:0048476	Holliday junction resolvase complex	cellular_component	0.27704	0.98934	2
GO:0005451	monovalent cation:hydrogen antiporter activity	molecular_function	0.27745	0.98934	2
GO:0015491	cation:cation antiporter activity	molecular_function	0.27745	0.98934	2
GO:0030001	metal ion transport	biological_process	0.27799	0.98934	143
GO:0006464	cellular protein modification process	biological_process	0.27812	0.98934	542
GO:0036211	protein modification process	biological_process	0.27812	0.98934	542
GO:0016810	hydrolase activity, acting on carbon-nitrogen (but not peptide) bonds	molecular_function	0.27859	0.99013	27
GO:0008882	[glutamate-ammonia-ligase] adenylyltransferase activity	molecular_function	0.2796	0.99284	1
GO:0006417	regulation of translation	biological_process	0.27985	0.99284	7
GO:0006113	fermentation	biological_process	0.2805	0.99336	4
GO:0019665	anaerobic amino acid catabolic process	biological_process	0.2805	0.99336	4
GO:0048519	negative regulation of biological process	biological_process	0.28074	0.99336	43
GO:0016125	sterol metabolic process	biological_process	0.28122	0.99349	3
GO:0016634	oxidoreductase activity, acting on the CH-CH group of donors, oxygen as acceptor	molecular_function	0.28127	0.99349	5
GO:0050853	B cell receptor signaling pathway	biological_process	0.28204	0.99456	1
GO:0008839	4-hydroxy-tetrahydrodipicolinate reductase	molecular_function	0.28221	0.99456	9
GO:0008080	N-acetyltransferase activity	molecular_function	0.28232	0.99456	25
GO:0016814	hydrolase activity, acting on carbon-nitrogen (but not peptide) bonds, in cyclic amidines	molecular_function	0.28265	0.99487	11
GO:0004529	exodeoxyribonuclease activity	molecular_function	0.28322	0.9951	10
GO:0016895	exodeoxyribonuclease activity, producing 5'-phosphomonoesters	molecular_function	0.28322	0.9951	10
GO:0006730	one-carbon metabolic process	biological_process	0.28423	0.9978	3
GO:0006468	protein phosphorylation	biological_process	0.28467	0.99813	392
GO:0046658	anchored to plasma membrane	cellular_component	0.28506	0.99813	1
GO:0009445	putrescine metabolic process	biological_process	0.2857	0.99813	1
GO:0009446	putrescine biosynthetic process	biological_process	0.2857	0.99813	1
GO:0010033	response to organic substance	biological_process	0.28639	0.99813	22
GO:0009426	bacterial-type flagellum basal body, distal rod	cellular_component	0.28657	0.99813	2
GO:0009427	bacterial-type flagellum basal body, distal rod, L ring	cellular_component	0.28657	0.99813	2
GO:0001871	pattern binding	molecular_function	0.28736	0.99813	20
GO:0030247	polysaccharide binding	molecular_function	0.28736	0.99813	20
GO:0032324	molybdopterin cofactor biosynthetic process	biological_process	0.28787	0.99813	6
GO:0043545	molybdopterin cofactor metabolic process	biological_process	0.28787	0.99813	6
GO:0030688	preribosome, small subunit precursor	cellular_component	0.28806	0.99813	3
GO:0006909	phagocytosis	biological_process	0.28936	0.99813	3
GO:0004066	asparagine synthase (glutamine-hydrolyzing) activity	molecular_function	0.28964	0.99813	4
GO:0006528	asparagine metabolic process	biological_process	0.28964	0.99813	4
GO:0006529	asparagine biosynthetic process	biological_process	0.28964	0.99813	4
GO:0004602	glutathione peroxidase activity	molecular_function	0.29	0.99813	5
GO:0045261	proton-transporting ATP synthase complex, catalytic core F(1)	cellular_component	0.29073	0.99813	8
GO:0019385	methanogenesis, from acetate	biological_process	0.29124	0.99813	2
GO:0018112	proline racemase activity	molecular_function	0.2916	0.99813	1
GO:0016567	protein ubiquitination	biological_process	0.29178	0.99813	33
GO:0072329	monocarboxylic acid catabolic process	biological_process	0.29237	0.99813	6
GO:0005047	signal recognition particle binding	molecular_function	0.29243	0.99813	2
GO:0005785	signal recognition particle receptor complex	cellular_component	0.29243	0.99813	2
GO:0004115	3',5'-cyclic-AMP phosphodiesterase activity	molecular_function	0.29278	0.99813	2
GO:0006198	cAMP catabolic process	biological_process	0.29278	0.99813	2
GO:0004571	mannosyl-oligosaccharide 1,2-alpha-mannosidase activity	molecular_function	0.29338	0.99813	3
GO:0015924	mannosyl-oligosaccharide mannosidase activity	molecular_function	0.29338	0.99813	3
GO:0004435	phosphatidylinositol phospholipase C activity	molecular_function	0.29344	0.99813	6
GO:0004629	phospholipase C activity	molecular_function	0.29344	0.99813	6
GO:0050909	sensory perception of taste	biological_process	0.2935	0.99813	3
GO:0006729	tetrahydrobiopterin biosynthetic process	biological_process	0.29366	0.99813	2
GO:0008124	4-alpha-hydroxytetrahydrobiopterin dehydratase activity	molecular_function	0.29366	0.99813	2
GO:0046146	tetrahydrobiopterin metabolic process	biological_process	0.29366	0.99813	2
GO:0070925	organelle assembly	biological_process	0.29388	0.99813	21
GO:0060966	regulation of gene silencing by RNA	biological_process	0.29404	0.99813	1
GO:0060967	negative regulation of gene silencing by RNA	biological_process	0.29404	0.99813	1
GO:0060968	regulation of gene silencing	biological_process	0.29404	0.99813	1
GO:0060969	negative regulation of gene silencing	biological_process	0.29404	0.99813	1
GO:0006650	glycerophospholipid metabolic process	biological_process	0.29493	0.99873	48
GO:0051336	regulation of hydrolase activity	biological_process	0.29534	0.99873	27
GO:0005783	endoplasmic reticulum	cellular_component	0.29558	0.99873	63
GO:0072519	parasitism	biological_process	0.29571	0.99873	2
GO:0040011	locomotion	biological_process	0.29642	0.99873	50
GO:0005727	extrachromosomal circular DNA	cellular_component	0.2972	0.99873	3
GO:0046821	extrachromosomal DNA	cellular_component	0.2972	0.99873	3
GO:0034622	cellular macromolecular complex assembly	biological_process	0.29724	0.99873	66
GO:0030100	regulation of endocytosis	biological_process	0.29726	0.99873	1
GO:0045806	negative regulation of endocytosis	biological_process	0.29726	0.99873	1
GO:0050764	regulation of phagocytosis	biological_process	0.29726	0.99873	1
GO:0050765	negative regulation of phagocytosis	biological_process	0.29726	0.99873	1
GO:0010564	regulation of cell cycle process	biological_process	0.29745	0.99873	13
GO:0016010	dystrophin-associated glycoprotein complex	cellular_component	0.29787	0.99901	7
GO:0005911	cell-cell junction	cellular_component	0.29822	0.99901	4
GO:0045595	regulation of cell differentiation	biological_process	0.29828	0.99901	2
GO:0008914	leucyltransferase activity	molecular_function	0.29961	1	1
GO:0016591	DNA-directed RNA polymerase II, holoenzyme	cellular_component	0.30054	1	14
GO:0005759	mitochondrial matrix	cellular_component	0.30114	1	6
GO:0016740	transferase activity	molecular_function	0.3019	1	1229
GO:0016701	oxidoreductase activity, acting on single donors with incorporation of molecular oxygen	molecular_function	0.30279	1	29
GO:0006811	ion transport	biological_process	0.30294	1	332
GO:0030131	clathrin adaptor complex	cellular_component	0.30296	1	11
GO:0003857	3-hydroxyacyl-CoA dehydrogenase activity	molecular_function	0.3036	1	24
GO:0004424	imidazoleglycerol-phosphate dehydratase activity	molecular_function	0.30413	1	1
GO:0031974	membrane-enclosed lumen	cellular_component	0.30439	1	104
GO:0000917	barrier septum assembly	biological_process	0.3049	1	20
GO:0032506	cytokinetic process	biological_process	0.3049	1	20
GO:0090529	cell septum assembly	biological_process	0.3049	1	20
GO:0001539	ciliary or bacterial-type flagellar motility	biological_process	0.30537	1	7
GO:0044765	single-organism transport	biological_process	0.30591	1	670
GO:0035299	inositol pentakisphosphate 2-kinase activity	molecular_function	0.30594	1	1
GO:0036126	sperm flagellum	cellular_component	0.30714	1	1
GO:0044441	cilium part	cellular_component	0.30714	1	1
GO:0097223	sperm part	cellular_component	0.30714	1	1
GO:0097228	sperm principal piece	cellular_component	0.30714	1	1
GO:0031423	hexon binding	molecular_function	0.30767	1	3
GO:0004047	aminomethyltransferase activity	molecular_function	0.30833	1	2
GO:0009791	post-embryonic development	biological_process	0.30975	1	7
GO:0009878	nodule morphogenesis	biological_process	0.30975	1	7
GO:0009886	post-embryonic morphogenesis	biological_process	0.30975	1	7
GO:0044111	development involved in symbiotic interaction	biological_process	0.30975	1	7
GO:0009360	DNA polymerase III complex	cellular_component	0.31012	1	6
GO:0042575	DNA polymerase complex	cellular_component	0.31012	1	6
GO:0042325	regulation of phosphorylation	biological_process	0.31064	1	5
GO:0006777	Mo-molybdopterin cofactor biosynthetic process	biological_process	0.31076	1	5
GO:0019720	Mo-molybdopterin cofactor metabolic process	biological_process	0.31076	1	5
GO:0044743	intracellular protein transmembrane import	biological_process	0.31099	1	6
GO:0065002	intracellular protein transmembrane transport	biological_process	0.31099	1	6
GO:0009628	response to abiotic stimulus	biological_process	0.31166	1	8
GO:0034470	ncRNA processing	biological_process	0.31176	1	119
GO:0004411	homogentisate 1,2-dioxygenase activity	molecular_function	0.31291	1	1
GO:0006559	L-phenylalanine catabolic process	biological_process	0.31291	1	1
GO:1902222	erythrose 4-phosphate/phosphoenolpyruvate family amino acid catabolic process	biological_process	0.31291	1	1
GO:0004751	ribose-5-phosphate isomerase activity	molecular_function	0.313	1	2
GO:0009052	pentose-phosphate shunt, non-oxidative branch	biological_process	0.313	1	2
GO:0048522	positive regulation of cellular process	biological_process	0.3132	1	52
GO:0009218	pyrimidine ribonucleotide metabolic process	biological_process	0.31351	1	9
GO:0009220	pyrimidine ribonucleotide biosynthetic process	biological_process	0.31351	1	9
GO:0003864	3-methyl-2-oxobutanoate hydroxymethyltransferase activity	molecular_function	0.31418	1	1
GO:0051129	negative regulation of cellular component organization	biological_process	0.31477	1	3
GO:0005242	inward rectifier potassium channel activity	molecular_function	0.31496	1	1
GO:0006814	sodium ion transport	biological_process	0.31511	1	20
GO:0006858	extracellular transport	biological_process	0.31598	1	3
GO:0019028	viral capsid	cellular_component	0.31614	1	74
GO:0004373	glycogen (starch) synthase activity	molecular_function	0.31772	1	1
GO:0000098	sulfur amino acid catabolic process	biological_process	0.31941	1	1
GO:0030328	prenylcysteine catabolic process	biological_process	0.31941	1	1
GO:0030329	prenylcysteine metabolic process	biological_process	0.31941	1	1
GO:0042219	cellular modified amino acid catabolic process	biological_process	0.31941	1	1
GO:0044273	sulfur compound catabolic process	biological_process	0.31941	1	1
GO:0008818	cobalamin 5'-phosphate synthase activity	molecular_function	0.31948	1	1
GO:0007631	feeding behavior	biological_process	0.32002	1	2
GO:0050795	regulation of behavior	biological_process	0.32036	1	1
GO:0050920	regulation of chemotaxis	biological_process	0.32036	1	1
GO:0006563	L-serine metabolic process	biological_process	0.32076	1	5
GO:0005057	receptor signaling protein activity	molecular_function	0.3218	1	1
GO:0006139	nucleobase-containing compound metabolic process	biological_process	0.32214	1	1267
GO:0004807	triose-phosphate isomerase activity	molecular_function	0.32254	1	3
GO:0019954	asexual reproduction	biological_process	0.32267	1	19
GO:0008290	F-actin capping protein complex	cellular_component	0.32292	1	3
GO:0031704	apelin receptor binding	molecular_function	0.32373	1	1
GO:0030260	entry into host cell	biological_process	0.32436	1	10
GO:0044409	entry into host	biological_process	0.32436	1	10
GO:0046718	viral entry into host cell	biological_process	0.32436	1	10
GO:0051806	entry into cell of other organism involved in symbiotic interaction	biological_process	0.32436	1	10
GO:0051828	entry into other organism involved in symbiotic interaction	biological_process	0.32436	1	10
GO:0009074	aromatic amino acid family catabolic process	biological_process	0.32472	1	2
GO:0000772	mating pheromone activity	molecular_function	0.32562	1	5
GO:0003008	system process	biological_process	0.32671	1	13
GO:0019684	photosynthesis, light reaction	biological_process	0.32737	1	13
GO:0016857	racemase and epimerase activity, acting on carbohydrates and derivatives	molecular_function	0.32801	1	6
GO:0005905	coated pit	cellular_component	0.32806	1	4
GO:0012510	trans-Golgi network transport vesicle membrane	cellular_component	0.32806	1	4
GO:0030125	clathrin vesicle coat	cellular_component	0.32806	1	4
GO:0030130	clathrin coat of trans-Golgi network vesicle	cellular_component	0.32806	1	4
GO:0030132	clathrin coat of coated pit	cellular_component	0.32806	1	4
GO:0030136	clathrin-coated vesicle	cellular_component	0.32806	1	4
GO:0030140	trans-Golgi network transport vesicle	cellular_component	0.32806	1	4
GO:0030665	clathrin-coated vesicle membrane	cellular_component	0.32806	1	4
GO:0048518	positive regulation of biological process	biological_process	0.32855	1	53
GO:0000075	cell cycle checkpoint	biological_process	0.32939	1	7
GO:0010948	negative regulation of cell cycle process	biological_process	0.32939	1	7
GO:1901988	negative regulation of cell cycle phase transition	biological_process	0.32939	1	7
GO:0052652	cyclic purine nucleotide metabolic process	biological_process	0.3294	1	2
GO:0018196	peptidyl-asparagine modification	biological_process	0.33012	1	1
GO:0018279	protein N-linked glycosylation via asparagine	biological_process	0.33012	1	1
GO:0016841	ammonia-lyase activity	molecular_function	0.33037	1	7
GO:0007129	synapsis	biological_process	0.33111	1	5
GO:0007130	synaptonemal complex assembly	biological_process	0.33111	1	5
GO:0070192	chromosome organization involved in meiosis	biological_process	0.33111	1	5
GO:0070193	synaptonemal complex organization	biological_process	0.33111	1	5
GO:0031532	actin cytoskeleton reorganization	biological_process	0.33216	1	1
GO:0032319	regulation of Rho GTPase activity	biological_process	0.33216	1	1
GO:0032320	positive regulation of Ras GTPase activity	biological_process	0.33216	1	1
GO:0032321	positive regulation of Rho GTPase activity	biological_process	0.33216	1	1
GO:0032856	activation of Ras GTPase activity	biological_process	0.33216	1	1
GO:0032862	activation of Rho GTPase activity	biological_process	0.33216	1	1
GO:0043547	positive regulation of GTPase activity	biological_process	0.33216	1	1
GO:0007126	meiosis	biological_process	0.33216	1	11
GO:0051321	meiotic cell cycle	biological_process	0.33216	1	11
GO:0005143	interleukin-12 receptor binding	molecular_function	0.33233	1	1
GO:0030054	cell junction	cellular_component	0.33248	1	6
GO:0004055	argininosuccinate synthase activity	molecular_function	0.33275	1	1
GO:0004358	glutamate N-acetyltransferase activity	molecular_function	0.33353	1	1
GO:0008083	growth factor activity	molecular_function	0.33494	1	15
GO:0031082	BLOC complex	cellular_component	0.33547	1	2
GO:0031083	BLOC-1 complex	cellular_component	0.33547	1	2
GO:0050380	undecaprenyl-diphosphatase activity	molecular_function	0.33579	1	1
GO:0006066	alcohol metabolic process	biological_process	0.33606	1	19
GO:0051246	regulation of protein metabolic process	biological_process	0.33638	1	11
GO:0031369	translation initiation factor binding	molecular_function	0.33687	1	5
GO:0031988	membrane-bounded vesicle	cellular_component	0.33697	1	21
GO:0000428	DNA-directed RNA polymerase complex	cellular_component	0.33728	1	16
GO:0030880	RNA polymerase complex	cellular_component	0.33728	1	16
GO:0055029	nuclear DNA-directed RNA polymerase complex	cellular_component	0.33728	1	16
GO:0046422	violaxanthin de-epoxidase activity	molecular_function	0.33798	1	1
GO:0033036	macromolecule localization	biological_process	0.33816	1	307
GO:0046486	glycerolipid metabolic process	biological_process	0.33861	1	50
GO:0051287	NAD binding	molecular_function	0.33903	1	44
GO:0005747	mitochondrial respiratory chain complex I	cellular_component	0.33946	1	2
GO:0030964	NADH dehydrogenase complex	cellular_component	0.33946	1	2
GO:0045271	respiratory chain complex I	cellular_component	0.33946	1	2
GO:0004559	alpha-mannosidase activity	molecular_function	0.34042	1	4
GO:0008813	chorismate lyase activity	molecular_function	0.34083	1	1
GO:0005852	eukaryotic translation initiation factor 3 complex	cellular_component	0.34096	1	8
GO:0007266	Rho protein signal transduction	biological_process	0.34264	1	2
GO:0035023	regulation of Rho protein signal transduction	biological_process	0.34264	1	2
GO:0045926	negative regulation of growth	biological_process	0.34305	1	1
GO:0015385	sodium:hydrogen antiporter activity	molecular_function	0.34404	1	1
GO:0009452	7-methylguanosine RNA capping	biological_process	0.34434	1	13
GO:0036260	RNA capping	biological_process	0.34434	1	13
GO:0004833	tryptophan 2,3-dioxygenase activity	molecular_function	0.34482	1	1
GO:0006569	tryptophan catabolic process	biological_process	0.34482	1	1
GO:0009310	amine catabolic process	biological_process	0.34482	1	1
GO:0019441	tryptophan catabolic process to kynurenine	biological_process	0.34482	1	1
GO:0042402	cellular biogenic amine catabolic process	biological_process	0.34482	1	1
GO:0042436	indole-containing compound catabolic process	biological_process	0.34482	1	1
GO:0042537	benzene-containing compound metabolic process	biological_process	0.34482	1	1
GO:0046218	indolalkylamine catabolic process	biological_process	0.34482	1	1
GO:0070189	kynurenine metabolic process	biological_process	0.34482	1	1
GO:0018759	methenyltetrahydromethanopterin cyclohydrolase activity	molecular_function	0.34486	1	1
GO:0008115	sarcosine oxidase activity	molecular_function	0.3456	1	1
GO:0016647	oxidoreductase activity, acting on the CH-NH group of donors, oxygen as acceptor	molecular_function	0.3456	1	1
GO:0046653	tetrahydrofolate metabolic process	biological_process	0.3456	1	1
GO:0004074	biliverdin reductase activity	molecular_function	0.34561	1	1
GO:0042167	heme catabolic process	biological_process	0.34561	1	1
GO:0003994	aconitate hydratase activity	molecular_function	0.34562	1	1
GO:0009132	nucleoside diphosphate metabolic process	biological_process	0.34568	1	4
GO:0008237	metallopeptidase activity	molecular_function	0.34607	1	35
GO:0005249	voltage-gated potassium channel activity	molecular_function	0.34607	1	3
GO:0009214	cyclic nucleotide catabolic process	biological_process	0.34613	1	2
GO:0009271	phage shock	biological_process	0.34679	1	5
GO:0016023	cytoplasmic membrane-bounded vesicle	cellular_component	0.34688	1	20
GO:0033925	mannosyl-glycoprotein endo-beta-N-acetylglucosaminidase activity	molecular_function	0.34692	1	1
GO:0022804	active transmembrane transporter activity	molecular_function	0.34721	1	112
GO:0016746	transferase activity, transferring acyl groups	molecular_function	0.34722	1	128
GO:0005375	copper ion transmembrane transporter activity	molecular_function	0.34739	1	3
GO:0035434	copper ion transmembrane transport	biological_process	0.34739	1	3
GO:0045158	electron transporter, transferring electrons within cytochrome b6/f complex of photosystem II activity	molecular_function	0.34745	1	3
GO:0006626	protein targeting to mitochondrion	biological_process	0.34756	1	8
GO:0070585	protein localization to mitochondrion	biological_process	0.34756	1	8
GO:0072655	establishment of protein localization to mitochondrion	biological_process	0.34756	1	8
GO:0008987	quinolinate synthetase A activity	molecular_function	0.34771	1	1
GO:0009372	quorum sensing	biological_process	0.34776	1	1
GO:0043768	S-ribosylhomocysteine lyase activity	molecular_function	0.34776	1	1
GO:0048872	homeostasis of number of cells	biological_process	0.34776	1	1
GO:0048874	homeostasis of number of cells in a free-living population	biological_process	0.34776	1	1
GO:0004013	adenosylhomocysteinase activity	molecular_function	0.34778	1	2
GO:0016801	hydrolase activity, acting on ether bonds	molecular_function	0.34778	1	2
GO:0016802	trialkylsulfonium hydrolase activity	molecular_function	0.34778	1	2
GO:0009039	urease activity	molecular_function	0.34798	1	1
GO:0016989	sigma factor antagonist activity	molecular_function	0.34841	1	1
GO:0003870	5-aminolevulinate synthase activity	molecular_function	0.34842	1	1
GO:0015562	efflux transmembrane transporter activity	molecular_function	0.34844	1	1
GO:0034639	L-amino acid efflux transmembrane transporter activity	molecular_function	0.34844	1	1
GO:0008191	metalloendopeptidase inhibitor activity	molecular_function	0.34844	1	1
GO:0010576	metalloenzyme regulator activity	molecular_function	0.34844	1	1
GO:0048551	metalloenzyme inhibitor activity	molecular_function	0.34844	1	1
GO:0030158	protein xylosyltransferase activity	molecular_function	0.34844	1	1
GO:0035252	UDP-xylosyltransferase activity	molecular_function	0.34844	1	1
GO:0042285	xylosyltransferase activity	molecular_function	0.34844	1	1
GO:0001533	cornified envelope	cellular_component	0.34845	1	1
GO:0009913	epidermal cell differentiation	biological_process	0.34845	1	1
GO:0030216	keratinocyte differentiation	biological_process	0.34845	1	1
GO:0030855	epithelial cell differentiation	biological_process	0.34845	1	1
GO:0060429	epithelium development	biological_process	0.34845	1	1
GO:0019902	phosphatase binding	molecular_function	0.34845	1	1
GO:0005523	tropomyosin binding	molecular_function	0.34845	1	1
GO:0003980	UDP-glucose:glycoprotein glucosyltransferase activity	molecular_function	0.34846	1	1
GO:0000128	flocculation	biological_process	0.34846	1	1
GO:0005665	DNA-directed RNA polymerase II, core complex	cellular_component	0.34847	1	1
GO:0035438	cyclic-di-GMP binding	molecular_function	0.34847	1	1
GO:0007243	intracellular protein kinase cascade	biological_process	0.34934	1	2
GO:0010627	regulation of intracellular protein kinase cascade	biological_process	0.34934	1	2
GO:0004860	protein kinase inhibitor activity	molecular_function	0.34951	1	5
GO:0019210	kinase inhibitor activity	molecular_function	0.34951	1	5
GO:0000346	transcription export complex	cellular_component	0.35187	1	4
GO:0000347	THO complex	cellular_component	0.35187	1	4
GO:0000445	THO complex part of transcription export complex	cellular_component	0.35187	1	4
GO:0030119	AP-type membrane coat adaptor complex	cellular_component	0.35215	1	11
GO:0003723	RNA binding	molecular_function	0.35288	1	270
GO:0015930	glutamate synthase activity	molecular_function	0.35363	1	6
GO:0016884	carbon-nitrogen ligase activity, with glutamine as amido-N-donor	molecular_function	0.3551	1	11
GO:0000097	sulfur amino acid biosynthetic process	biological_process	0.3552	1	6
GO:0004656	procollagen-proline 4-dioxygenase activity	molecular_function	0.35595	1	2
GO:0019798	procollagen-proline dioxygenase activity	molecular_function	0.35595	1	2
GO:0031543	peptidyl-proline dioxygenase activity	molecular_function	0.35595	1	2
GO:0031545	peptidyl-proline 4-dioxygenase activity	molecular_function	0.35595	1	2
GO:0004334	fumarylacetoacetase activity	molecular_function	0.35717	1	2
GO:0016822	hydrolase activity, acting on acid carbon-carbon bonds	molecular_function	0.35717	1	2
GO:0016823	hydrolase activity, acting on acid carbon-carbon bonds, in ketonic substances	molecular_function	0.35717	1	2
GO:0004652	polynucleotide adenylyltransferase activity	molecular_function	0.35717	1	6
GO:0051015	actin filament binding	molecular_function	0.35847	1	4
GO:1901615	organic hydroxy compound metabolic process	biological_process	0.35879	1	19
GO:0001934	positive regulation of protein phosphorylation	biological_process	0.35993	1	2
GO:0010562	positive regulation of phosphorus metabolic process	biological_process	0.35993	1	2
GO:0031401	positive regulation of protein modification process	biological_process	0.35993	1	2
GO:0042327	positive regulation of phosphorylation	biological_process	0.35993	1	2
GO:0045937	positive regulation of phosphate metabolic process	biological_process	0.35993	1	2
GO:0004064	arylesterase activity	molecular_function	0.36057	1	5
GO:0004664	prephenate dehydratase activity	molecular_function	0.36065	1	3
GO:0009094	L-phenylalanine biosynthetic process	biological_process	0.36065	1	3
GO:1902223	erythrose 4-phosphate/phosphoenolpyruvate family amino acid biosynthetic process	biological_process	0.36065	1	3
GO:0030145	manganese ion binding	molecular_function	0.36073	1	6
GO:0000462	maturation of SSU-rRNA from tricistronic rRNA transcript (SSU-rRNA, 5.8S rRNA, LSU-rRNA)	biological_process	0.36083	1	2
GO:0030490	maturation of SSU-rRNA	biological_process	0.36083	1	2
GO:0030686	90S preribosome	cellular_component	0.36083	1	2
GO:0042274	ribosomal small subunit biogenesis	biological_process	0.36083	1	2
GO:0008092	cytoskeletal protein binding	molecular_function	0.36242	1	82
GO:0042592	homeostatic process	biological_process	0.36251	1	72
GO:0016459	myosin complex	cellular_component	0.3636	1	17
GO:0016485	protein processing	biological_process	0.36369	1	14
GO:0051604	protein maturation	biological_process	0.36369	1	14
GO:0072509	divalent inorganic cation transmembrane transporter activity	molecular_function	0.36465	1	46
GO:0016780	phosphotransferase activity, for other substituted phosphate groups	molecular_function	0.36556	1	5
GO:0009893	positive regulation of metabolic process	biological_process	0.36653	1	43
GO:0031325	positive regulation of cellular metabolic process	biological_process	0.36653	1	43
GO:0016615	malate dehydrogenase activity	molecular_function	0.36685	1	5
GO:0005986	sucrose biosynthetic process	biological_process	0.36766	1	2
GO:0050307	sucrose-phosphate phosphatase activity	molecular_function	0.36766	1	2
GO:0006566	threonine metabolic process	biological_process	0.36776	1	2
GO:0009088	threonine biosynthetic process	biological_process	0.36776	1	2
GO:0009620	response to fungus	biological_process	0.36867	1	3
GO:0050832	defense response to fungus	biological_process	0.36867	1	3
GO:0016887	ATPase activity	molecular_function	0.36914	1	233
GO:0005184	neuropeptide hormone activity	molecular_function	0.36976	1	8
GO:0043461	proton-transporting ATP synthase complex assembly	biological_process	0.36988	1	2
GO:0070071	proton-transporting two-sector ATPase complex assembly	biological_process	0.36988	1	2
GO:0070272	proton-transporting ATP synthase complex biogenesis	biological_process	0.36988	1	2
GO:0010608	posttranscriptional regulation of gene expression	biological_process	0.37014	1	11
GO:0000159	protein phosphatase type 2A complex	cellular_component	0.37138	1	5
GO:0008287	protein serine/threonine phosphatase complex	cellular_component	0.37138	1	5
GO:0008601	protein phosphatase type 2A regulator activity	molecular_function	0.37138	1	5
GO:0019064	viral entry into host cell via membrane fusion with the plasma membrane	biological_process	0.37319	1	8
GO:0065008	regulation of biological quality	biological_process	0.37357	1	140
GO:0019031	viral envelope	cellular_component	0.37464	1	62
GO:0036338	viral membrane	cellular_component	0.37464	1	62
GO:0006816	calcium ion transport	biological_process	0.37493	1	5
GO:0009314	response to radiation	biological_process	0.37505	1	5
GO:0009416	response to light stimulus	biological_process	0.37505	1	5
GO:0016679	oxidoreductase activity, acting on diphenols and related substances as donors	molecular_function	0.37533	1	12
GO:0004852	uroporphyrinogen-III synthase activity	molecular_function	0.37642	1	2
GO:0009292	genetic transfer	biological_process	0.37765	1	2
GO:0008915	lipid-A-disaccharide synthase activity	molecular_function	0.37824	1	2
GO:0005272	sodium channel activity	molecular_function	0.3784	1	5
GO:0008837	diaminopimelate epimerase activity	molecular_function	0.37856	1	2
GO:0047661	amino-acid racemase activity	molecular_function	0.37856	1	2
GO:0009190	cyclic nucleotide biosynthetic process	biological_process	0.37888	1	4
GO:0006004	fucose metabolic process	biological_process	0.37915	1	2
GO:0008736	L-fucose isomerase activity	molecular_function	0.37915	1	2
GO:0048511	rhythmic process	biological_process	0.38031	1	3
GO:0012505	endomembrane system	cellular_component	0.38093	1	86
GO:0006396	RNA processing	biological_process	0.38121	1	195
GO:0009147	pyrimidine nucleoside triphosphate metabolic process	biological_process	0.3817	1	5
GO:0009244	lipopolysaccharide core region biosynthetic process	biological_process	0.38319	1	4
GO:0046401	lipopolysaccharide core region metabolic process	biological_process	0.38319	1	4
GO:0009156	ribonucleoside monophosphate biosynthetic process	biological_process	0.38319	1	10
GO:0009161	ribonucleoside monophosphate metabolic process	biological_process	0.38319	1	10
GO:0045596	negative regulation of cell differentiation	biological_process	0.38392	1	1
GO:0051093	negative regulation of developmental process	biological_process	0.38392	1	1
GO:0019646	aerobic electron transport chain	biological_process	0.38441	1	1
GO:0051258	protein polymerization	biological_process	0.38502	1	22
GO:0016641	oxidoreductase activity, acting on the CH-NH2 group of donors, oxygen as acceptor	molecular_function	0.38553	1	6
GO:0015399	primary active transmembrane transporter activity	molecular_function	0.38707	1	51
GO:0015405	P-P-bond-hydrolysis-driven transmembrane transporter activity	molecular_function	0.38707	1	51
GO:0000975	regulatory region DNA binding	molecular_function	0.38758	1	2
GO:0001067	regulatory region nucleic acid binding	molecular_function	0.38758	1	2
GO:0009173	pyrimidine ribonucleoside monophosphate metabolic process	biological_process	0.38842	1	6
GO:0009174	pyrimidine ribonucleoside monophosphate biosynthetic process	biological_process	0.38842	1	6
GO:0015850	organic hydroxy compound transport	biological_process	0.38887	1	2
GO:1901618	organic hydroxy compound transmembrane transporter activity	molecular_function	0.38887	1	2
GO:0004814	arginine-tRNA ligase activity	molecular_function	0.38985	1	2
GO:0006420	arginyl-tRNA aminoacylation	biological_process	0.38985	1	2
GO:0005246	calcium channel regulator activity	molecular_function	0.39035	1	8
GO:0019825	oxygen binding	molecular_function	0.39047	1	1
GO:0005099	Ras GTPase activator activity	molecular_function	0.3914	1	17
GO:0016714	oxidoreductase activity, acting on paired donors, with incorporation or reduction of molecular oxygen, reduced pteridine as one donor, and incorporation of one atom of oxygen	molecular_function	0.39359	1	3
GO:0006897	endocytosis	biological_process	0.3965	1	5
GO:0005092	GDP-dissociation inhibitor activity	molecular_function	0.39697	1	3
GO:0005094	Rho GDP-dissociation inhibitor activity	molecular_function	0.39697	1	3
GO:0016779	nucleotidyltransferase activity	molecular_function	0.39723	1	149
GO:0016863	intramolecular oxidoreductase activity, transposing C=C bonds	molecular_function	0.39723	1	2
GO:0047750	cholestenol delta-isomerase activity	molecular_function	0.39723	1	2
GO:0009898	internal side of plasma membrane	cellular_component	0.39746	1	5
GO:0000702	oxidized base lesion DNA N-glycosylase activity	molecular_function	0.39791	1	2
GO:0008534	oxidized purine nucleobase lesion DNA N-glycosylase activity	molecular_function	0.39791	1	2
GO:0031981	nuclear lumen	cellular_component	0.39795	1	91
GO:0012506	vesicle membrane	cellular_component	0.39893	1	19
GO:0030435	sporulation resulting in formation of a cellular spore	biological_process	0.39902	1	3
GO:0004800	thyroxine 5'-deiodinase activity	molecular_function	0.40075	1	1
GO:0004190	aspartic-type endopeptidase activity	molecular_function	0.40128	1	42
GO:0070001	aspartic-type peptidase activity	molecular_function	0.40128	1	42
GO:0052126	movement in host environment	biological_process	0.40137	1	17
GO:0052192	movement in environment of other organism involved in symbiotic interaction	biological_process	0.40137	1	17
GO:0019354	siroheme biosynthetic process	biological_process	0.40151	1	16
GO:0043115	precorrin-2 dehydrogenase activity	molecular_function	0.40151	1	16
GO:0046156	siroheme metabolic process	biological_process	0.40151	1	16
GO:0005811	lipid particle	cellular_component	0.4017	1	3
GO:0012511	monolayer-surrounded lipid storage body	cellular_component	0.4017	1	3
GO:0051189	prosthetic group metabolic process	biological_process	0.40244	1	6
GO:0008131	primary amine oxidase activity	molecular_function	0.40251	1	4
GO:0009065	glutamine family amino acid catabolic process	biological_process	0.40287	1	3
GO:0040007	growth	biological_process	0.40288	1	15
GO:0030354	melanin-concentrating hormone activity	molecular_function	0.40306	1	1
GO:0042802	identical protein binding	molecular_function	0.40428	1	65
GO:0043043	peptide biosynthetic process	biological_process	0.40434	1	7
GO:0004668	protein-arginine deiminase activity	molecular_function	0.40483	1	2
GO:0008033	tRNA processing	biological_process	0.40486	1	94
GO:0004635	phosphoribosyl-AMP cyclohydrolase activity	molecular_function	0.40571	1	2
GO:0007015	actin filament organization	biological_process	0.40714	1	4
GO:0004040	amidase activity	molecular_function	0.40778	1	1
GO:0016999	antibiotic metabolic process	biological_process	0.4082	1	2
GO:0017000	antibiotic biosynthetic process	biological_process	0.4082	1	2
GO:0017144	drug metabolic process	biological_process	0.4082	1	2
GO:0043752	adenosylcobinamide kinase activity	molecular_function	0.40857	1	1
GO:0008144	drug binding	molecular_function	0.40872	1	6
GO:0004779	sulfate adenylyltransferase activity	molecular_function	0.4096	1	2
GO:0004781	sulfate adenylyltransferase (ATP) activity	molecular_function	0.4096	1	2
GO:0008479	queuine tRNA-ribosyltransferase activity	molecular_function	0.40985	1	2
GO:0008616	queuosine biosynthetic process	biological_process	0.40985	1	2
GO:0046116	queuosine metabolic process	biological_process	0.40985	1	2
GO:0006643	membrane lipid metabolic process	biological_process	0.41013	1	43
GO:0008686	3,4-dihydroxy-2-butanone-4-phosphate synthase activity	molecular_function	0.41026	1	2
GO:0004828	serine-tRNA ligase activity	molecular_function	0.41042	1	13
GO:0006434	seryl-tRNA aminoacylation	biological_process	0.41042	1	13
GO:0005789	endoplasmic reticulum membrane	cellular_component	0.41133	1	29
GO:0042175	nuclear outer membrane-endoplasmic reticulum membrane network	cellular_component	0.41133	1	29
GO:0030120	vesicle coat	cellular_component	0.41135	1	18
GO:0030135	coated vesicle	cellular_component	0.41135	1	18
GO:0030659	cytoplasmic vesicle membrane	cellular_component	0.41135	1	18
GO:0030662	coated vesicle membrane	cellular_component	0.41135	1	18
GO:0004175	endopeptidase activity	molecular_function	0.41188	1	170
GO:0016286	small conductance calcium-activated potassium channel activity	molecular_function	0.41286	1	2
GO:0042060	wound healing	biological_process	0.41318	1	19
GO:0008138	protein tyrosine/serine/threonine phosphatase activity	molecular_function	0.41319	1	10
GO:0015923	mannosidase activity	molecular_function	0.41329	1	4
GO:0003779	actin binding	molecular_function	0.41694	1	40
GO:0019239	deaminase activity	molecular_function	0.4191	1	5
GO:0003933	GTP cyclohydrolase activity	molecular_function	0.41925	1	3
GO:0003935	GTP cyclohydrolase II activity	molecular_function	0.41925	1	3
GO:0017025	TBP-class protein binding	molecular_function	0.4207	1	4
GO:0004672	protein kinase activity	molecular_function	0.4218	1	418
GO:0051775	response to redox state	biological_process	0.42197	1	2
GO:0009877	nodulation	biological_process	0.42347	1	13
GO:0043168	anion binding	molecular_function	0.42429	1	1165
GO:0004129	cytochrome-c oxidase activity	molecular_function	0.42439	1	19
GO:0016675	oxidoreductase activity, acting on a heme group of donors	molecular_function	0.42439	1	19
GO:0016676	oxidoreductase activity, acting on a heme group of donors, oxygen as acceptor	molecular_function	0.42439	1	19
GO:0031647	regulation of protein stability	biological_process	0.42477	1	4
GO:0042301	phosphate ion binding	molecular_function	0.42477	1	4
GO:0050821	protein stabilization	biological_process	0.42477	1	4
GO:0060627	regulation of vesicle-mediated transport	biological_process	0.42505	1	3
GO:0030259	lipid glycosylation	biological_process	0.42546	1	31
GO:0000272	polysaccharide catabolic process	biological_process	0.4268	1	11
GO:0015370	solute:sodium symporter activity	molecular_function	0.42844	1	6
GO:0004579	dolichyl-diphosphooligosaccharide-protein glycotransferase activity	molecular_function	0.42879	1	4
GO:0003883	CTP synthase activity	molecular_function	0.42924	1	2
GO:0016747	transferase activity, transferring acyl groups other than amino-acyl groups	molecular_function	0.4299	1	100
GO:0006784	heme a biosynthetic process	biological_process	0.43013	1	1
GO:0046160	heme a metabolic process	biological_process	0.43013	1	1
GO:0008810	cellulase activity	molecular_function	0.43054	1	2
GO:0003951	NAD+ kinase activity	molecular_function	0.43058	1	6
GO:0006741	NADP biosynthetic process	biological_process	0.43058	1	6
GO:0008297	single-stranded DNA specific exodeoxyribonuclease activity	molecular_function	0.43096	1	2
GO:0035312	5'-3' exodeoxyribonuclease activity	molecular_function	0.43096	1	2
GO:0045145	single-stranded DNA specific 5'-3' exodeoxyribonuclease activity	molecular_function	0.43096	1	2
GO:0050830	defense response to Gram-positive bacterium	biological_process	0.43295	1	2
GO:0003677	DNA binding	molecular_function	0.43346	1	693
GO:0015097	mercury ion transmembrane transporter activity	molecular_function	0.43402	1	2
GO:0015694	mercury ion transport	biological_process	0.43402	1	2
GO:0046689	response to mercury ion	biological_process	0.43402	1	2
GO:0050787	detoxification of mercury ion	biological_process	0.43402	1	2
GO:0015002	heme-copper terminal oxidase activity	molecular_function	0.43496	1	20
GO:0051347	positive regulation of transferase activity	biological_process	0.43551	1	1
GO:0005048	signal sequence binding	molecular_function	0.43562	1	5
GO:0042277	peptide binding	molecular_function	0.43562	1	5
GO:0000172	ribonuclease MRP complex	cellular_component	0.43656	1	1
GO:0006379	mRNA cleavage	biological_process	0.43656	1	1
GO:0030677	ribonuclease P complex	cellular_component	0.43656	1	1
GO:0043565	sequence-specific DNA binding	molecular_function	0.43706	1	152
GO:0008318	protein prenyltransferase activity	molecular_function	0.43715	1	5
GO:0004612	phosphoenolpyruvate carboxykinase (ATP) activity	molecular_function	0.43729	1	3
GO:0005750	mitochondrial respiratory chain complex III	cellular_component	0.43737	1	2
GO:0006122	mitochondrial electron transport, ubiquinol to cytochrome c	biological_process	0.43737	1	2
GO:0045275	respiratory chain complex III	cellular_component	0.43737	1	2
GO:0009279	cell outer membrane	cellular_component	0.43751	1	4
GO:0006955	immune response	biological_process	0.43762	1	20
GO:0005853	eukaryotic translation elongation factor 1 complex	cellular_component	0.43838	1	3
GO:0043549	regulation of kinase activity	biological_process	0.43872	1	3
GO:0045859	regulation of protein kinase activity	biological_process	0.43872	1	3
GO:0004550	nucleoside diphosphate kinase activity	molecular_function	0.44007	1	3
GO:0006165	nucleoside diphosphate phosphorylation	biological_process	0.44007	1	3
GO:0006183	GTP biosynthetic process	biological_process	0.44007	1	3
GO:0006228	UTP biosynthetic process	biological_process	0.44007	1	3
GO:0006241	CTP biosynthetic process	biological_process	0.44007	1	3
GO:0009148	pyrimidine nucleoside triphosphate biosynthetic process	biological_process	0.44007	1	3
GO:0009208	pyrimidine ribonucleoside triphosphate metabolic process	biological_process	0.44007	1	3
GO:0009209	pyrimidine ribonucleoside triphosphate biosynthetic process	biological_process	0.44007	1	3
GO:0046036	CTP metabolic process	biological_process	0.44007	1	3
GO:0046051	UTP metabolic process	biological_process	0.44007	1	3
GO:0046939	nucleotide phosphorylation	biological_process	0.44007	1	3
GO:0038023	signaling receptor activity	molecular_function	0.44009	1	57
GO:0006220	pyrimidine nucleotide metabolic process	biological_process	0.44094	1	13
GO:0006808	regulation of nitrogen utilization	biological_process	0.44142	1	2
GO:0019740	nitrogen utilization	biological_process	0.44142	1	2
GO:0004415	hyalurononglucosaminidase activity	molecular_function	0.44203	1	1
GO:0015929	hexosaminidase activity	molecular_function	0.44203	1	1
GO:0005786	signal recognition particle, endoplasmic reticulum targeting	cellular_component	0.44312	1	1
GO:0030942	endoplasmic reticulum signal peptide binding	molecular_function	0.44312	1	1
GO:0016709	oxidoreductase activity, acting on paired donors, with incorporation or reduction of molecular oxygen, NAD(P)H as one donor, and incorporation of one atom of oxygen	molecular_function	0.44449	1	12
GO:0022904	respiratory electron transport chain	biological_process	0.44513	1	24
GO:0003849	3-deoxy-7-phosphoheptulonate synthase activity	molecular_function	0.44552	1	2
GO:0016973	poly(A)+ mRNA export from nucleus	biological_process	0.44562	1	2
GO:0006890	retrograde vesicle-mediated transport, Golgi to ER	biological_process	0.44569	1	10
GO:0004620	phospholipase activity	molecular_function	0.44609	1	7
GO:0004576	oligosaccharyl transferase activity	molecular_function	0.44656	1	5
GO:0009415	response to water stimulus	biological_process	0.44691	1	3
GO:1901700	response to oxygen-containing compound	biological_process	0.44691	1	3
GO:0006171	cAMP biosynthetic process	biological_process	0.44798	1	1
GO:0001932	regulation of protein phosphorylation	biological_process	0.44874	1	4
GO:0031399	regulation of protein modification process	biological_process	0.44874	1	4
GO:0070972	protein localization to endoplasmic reticulum	biological_process	0.44888	1	28
GO:0006189	'de novo' IMP biosynthetic process	biological_process	0.44989	1	1
GO:0006368	transcription elongation from RNA polymerase II promoter	biological_process	0.45022	1	1
GO:0008023	transcription elongation factor complex	cellular_component	0.45022	1	1
GO:0020002	host cell plasma membrane	cellular_component	0.45042	1	1
GO:0044156	host cell junction	cellular_component	0.45042	1	1
GO:0030261	chromosome condensation	biological_process	0.45194	1	2
GO:0004421	hydroxymethylglutaryl-CoA synthase activity	molecular_function	0.45255	1	2
GO:0046873	metal ion transmembrane transporter activity	molecular_function	0.4527	1	103
GO:0009405	pathogenesis	biological_process	0.45366	1	66
GO:0005097	Rab GTPase activator activity	molecular_function	0.45393	1	14
GO:0010833	telomere maintenance via telomere lengthening	biological_process	0.45444	1	1
GO:0009521	photosystem	cellular_component	0.45635	1	50
GO:0010927	cellular component assembly involved in morphogenesis	biological_process	0.45706	1	2
GO:0032990	cell part morphogenesis	biological_process	0.45706	1	2
GO:0034464	BBSome	cellular_component	0.45706	1	2
GO:0042384	cilium assembly	biological_process	0.45706	1	2
GO:0048858	cell projection morphogenesis	biological_process	0.45706	1	2
GO:0060271	cilium morphogenesis	biological_process	0.45706	1	2
GO:0009118	regulation of nucleoside metabolic process	biological_process	0.4574	1	22
GO:0030811	regulation of nucleotide catabolic process	biological_process	0.4574	1	22
GO:0033121	regulation of purine nucleotide catabolic process	biological_process	0.4574	1	22
GO:1900542	regulation of purine nucleotide metabolic process	biological_process	0.4574	1	22
GO:0008081	phosphoric diester hydrolase activity	molecular_function	0.45768	1	19
GO:0045934	negative regulation of nucleobase-containing compound metabolic process	biological_process	0.45805	1	14
GO:0051172	negative regulation of nitrogen compound metabolic process	biological_process	0.45805	1	14
GO:0016620	oxidoreductase activity, acting on the aldehyde or oxo group of donors, NAD or NADP as acceptor	molecular_function	0.45937	1	21
GO:0005126	cytokine receptor binding	molecular_function	0.45948	1	14
GO:0015031	protein transport	biological_process	0.46024	1	251
GO:0045184	establishment of protein localization	biological_process	0.46024	1	251
GO:0005215	transporter activity	molecular_function	0.46034	1	498
GO:0000275	mitochondrial proton-transporting ATP synthase complex, catalytic core F(1)	cellular_component	0.46155	1	4
GO:0005542	folic acid binding	molecular_function	0.46166	1	2
GO:0072341	modified amino acid binding	molecular_function	0.46166	1	2
GO:0005635	nuclear envelope	cellular_component	0.46167	1	25
GO:0015939	pantothenate metabolic process	biological_process	0.46236	1	2
GO:0015940	pantothenate biosynthetic process	biological_process	0.46236	1	2
GO:0008649	rRNA methyltransferase activity	molecular_function	0.46238	1	11
GO:0006383	transcription from RNA polymerase III promoter	biological_process	0.46286	1	3
GO:0022607	cellular component assembly	biological_process	0.46304	1	132
GO:0006479	protein methylation	biological_process	0.46409	1	26
GO:0008213	protein alkylation	biological_process	0.46409	1	26
GO:0050661	NADP binding	molecular_function	0.46421	1	17
GO:0015081	sodium ion transmembrane transporter activity	molecular_function	0.46538	1	15
GO:0008203	cholesterol metabolic process	biological_process	0.46584	1	1
GO:0051205	protein insertion into membrane	biological_process	0.46902	1	5
GO:0051668	localization within membrane	biological_process	0.46902	1	5
GO:0005885	Arp2/3 protein complex	cellular_component	0.47006	1	2
GO:0010638	positive regulation of organelle organization	biological_process	0.47006	1	2
GO:0030838	positive regulation of actin filament polymerization	biological_process	0.47006	1	2
GO:0031334	positive regulation of protein complex assembly	biological_process	0.47006	1	2
GO:0032273	positive regulation of protein polymerization	biological_process	0.47006	1	2
GO:0034314	Arp2/3 complex-mediated actin nucleation	biological_process	0.47006	1	2
GO:0045010	actin nucleation	biological_process	0.47006	1	2
GO:0051495	positive regulation of cytoskeleton organization	biological_process	0.47006	1	2
GO:0015129	lactate transmembrane transporter activity	molecular_function	0.47069	1	1
GO:0015727	lactate transport	biological_process	0.47069	1	1
GO:0006614	SRP-dependent cotranslational protein targeting to membrane	biological_process	0.47122	1	24
GO:0045047	protein targeting to ER	biological_process	0.47122	1	24
GO:0072599	establishment of protein localization to endoplasmic reticulum	biological_process	0.47122	1	24
GO:0004177	aminopeptidase activity	molecular_function	0.47188	1	18
GO:0005984	disaccharide metabolic process	biological_process	0.47193	1	15
GO:0003848	2-amino-4-hydroxy-6-hydroxymethyldihydropteridine diphosphokinase activity	molecular_function	0.4727	1	1
GO:0005669	transcription factor TFIID complex	cellular_component	0.47301	1	5
GO:0032446	protein modification by small protein conjugation	biological_process	0.47316	1	33
GO:0070647	protein modification by small protein conjugation or removal	biological_process	0.47316	1	33
GO:0031361	integral to thylakoid membrane	cellular_component	0.4741	1	2
GO:0030245	cellulose catabolic process	biological_process	0.47551	1	2
GO:0051275	beta-glucan catabolic process	biological_process	0.47551	1	2
GO:0016743	carboxyl- or carbamoyltransferase activity	molecular_function	0.47558	1	2
GO:0008883	glutamyl-tRNA reductase activity	molecular_function	0.47586	1	3
GO:0042578	phosphoric ester hydrolase activity	molecular_function	0.4762	1	59
GO:0050840	extracellular matrix binding	molecular_function	0.47629	1	2
GO:0004932	mating-type factor pheromone receptor activity	molecular_function	0.47703	1	2
GO:0010277	chlorophyllide a oxygenase [overall] activity	molecular_function	0.47773	1	3
GO:0015459	potassium channel regulator activity	molecular_function	0.4779	1	2
GO:0019870	potassium channel inhibitor activity	molecular_function	0.4779	1	2
GO:0051716	cellular response to stimulus	biological_process	0.47855	1	504
GO:0000077	DNA damage checkpoint	biological_process	0.4801	1	4
GO:0030896	checkpoint clamp complex	cellular_component	0.4801	1	4
GO:0031570	DNA integrity checkpoint	biological_process	0.4801	1	4
GO:0005515	protein binding	molecular_function	0.4801	1	1542
GO:0043933	macromolecular complex subunit organization	biological_process	0.48029	1	87
GO:0016791	phosphatase activity	molecular_function	0.48055	1	37
GO:0006024	glycosaminoglycan biosynthetic process	biological_process	0.48103	1	2
GO:0016799	hydrolase activity, hydrolyzing N-glycosyl compounds	molecular_function	0.48139	1	5
GO:0008855	exodeoxyribonuclease VII activity	molecular_function	0.4832	1	7
GO:0004568	chitinase activity	molecular_function	0.48351	1	6
GO:0006032	chitin catabolic process	biological_process	0.48351	1	6
GO:0046348	amino sugar catabolic process	biological_process	0.48351	1	6
GO:1901072	glucosamine-containing compound catabolic process	biological_process	0.48351	1	6
GO:0004470	malic enzyme activity	molecular_function	0.48376	1	4
GO:0004471	malate dehydrogenase (decarboxylating) activity	molecular_function	0.48376	1	4
GO:0034660	ncRNA metabolic process	biological_process	0.48399	1	156
GO:0006221	pyrimidine nucleotide biosynthetic process	biological_process	0.48524	1	11
GO:0016050	vesicle organization	biological_process	0.48551	1	4
GO:0065003	macromolecular complex assembly	biological_process	0.48569	1	76
GO:0005744	mitochondrial inner membrane presequence translocase complex	cellular_component	0.48616	1	2
GO:0019627	urea metabolic process	biological_process	0.48634	1	2
GO:0015932	nucleobase-containing compound transmembrane transporter activity	molecular_function	0.4864	1	8
GO:0015627	type II protein secretion system complex	cellular_component	0.48676	1	1
GO:0015628	protein secretion by the type II secretion system	biological_process	0.48676	1	1
GO:0016837	carbon-oxygen lyase activity, acting on polysaccharides	molecular_function	0.48693	1	6
GO:0016748	succinyltransferase activity	molecular_function	0.48731	1	2
GO:0030694	bacterial-type flagellum basal body, rod	cellular_component	0.48875	1	2
GO:0017048	Rho GTPase binding	molecular_function	0.4889	1	2
GO:0000334	3-hydroxyanthranilate 3,4-dioxygenase activity	molecular_function	0.48899	1	1
GO:0005343	organic acid:sodium symporter activity	molecular_function	0.4907	1	5
GO:0016638	oxidoreductase activity, acting on the CH-NH2 group of donors	molecular_function	0.49332	1	16
GO:0002200	somatic diversification of immune receptors	biological_process	0.49369	1	1
GO:0002520	immune system development	biological_process	0.49369	1	1
GO:0002562	somatic diversification of immune receptors via germline recombination within a single locus	biological_process	0.49369	1	1
GO:0016444	somatic cell DNA recombination	biological_process	0.49369	1	1
GO:0033151	V(D)J recombination	biological_process	0.49369	1	1
GO:0009294	DNA mediated transformation	biological_process	0.49458	1	1
GO:0006505	GPI anchor metabolic process	biological_process	0.495	1	33
GO:0032318	regulation of Ras GTPase activity	biological_process	0.49601	1	21
GO:0033124	regulation of GTP catabolic process	biological_process	0.49601	1	21
GO:0043087	regulation of GTPase activity	biological_process	0.49601	1	21
GO:0004869	cysteine-type endopeptidase inhibitor activity	molecular_function	0.49619	1	3
GO:0022892	substrate-specific transporter activity	molecular_function	0.4968	1	333
GO:0006026	aminoglycan catabolic process	biological_process	0.4972	1	7
GO:0030030	cell projection organization	biological_process	0.49722	1	8
GO:0004506	squalene monooxygenase activity	molecular_function	0.49812	1	3
GO:0000049	tRNA binding	molecular_function	0.49815	1	8
GO:0006952	defense response	biological_process	0.49876	1	73
GO:0004842	ubiquitin-protein ligase activity	molecular_function	0.50024	1	112
GO:0019787	small conjugating protein ligase activity	molecular_function	0.50024	1	112
GO:0004675	transmembrane receptor protein serine/threonine kinase activity	molecular_function	0.50081	1	3
GO:0019199	transmembrane receptor protein kinase activity	molecular_function	0.50081	1	3
GO:0009186	deoxyribonucleoside diphosphate metabolic process	biological_process	0.502	1	1
GO:0033743	peptide-methionine (R)-S-oxide reductase activity	molecular_function	0.50301	1	2
GO:0050897	cobalt ion binding	molecular_function	0.50347	1	2
GO:0042623	ATPase activity, coupled	molecular_function	0.50355	1	115
GO:0004499	N,N-dimethylaniline monooxygenase activity	molecular_function	0.50553	1	9
GO:0004345	glucose-6-phosphate dehydrogenase activity	molecular_function	0.50555	1	2
GO:0051382	kinetochore assembly	biological_process	0.5058	1	6
GO:0051383	kinetochore organization	biological_process	0.5058	1	6
GO:0015066	alpha-amylase inhibitor activity	molecular_function	0.5065	1	1
GO:0017172	cysteine dioxygenase activity	molecular_function	0.50656	1	3
GO:0046439	L-cysteine metabolic process	biological_process	0.50656	1	3
GO:0009095	aromatic amino acid family biosynthetic process, prephenate pathway	biological_process	0.50724	1	4
GO:0071804	cellular potassium ion transport	biological_process	0.50758	1	8
GO:0071805	potassium ion transmembrane transport	biological_process	0.50758	1	8
GO:0006188	IMP biosynthetic process	biological_process	0.50759	1	2
GO:0046040	IMP metabolic process	biological_process	0.50759	1	2
GO:0046912	transferase activity, transferring acyl groups, acyl groups converted into alkyl on transfer	molecular_function	0.50868	1	6
GO:0001653	peptide receptor activity	molecular_function	0.509	1	1
GO:0007622	rhythmic behavior	biological_process	0.509	1	1
GO:0008528	G-protein coupled peptide receptor activity	molecular_function	0.509	1	1
GO:0016499	orexin receptor activity	molecular_function	0.509	1	1
GO:0022410	circadian sleep/wake cycle process	biological_process	0.509	1	1
GO:0042745	circadian sleep/wake cycle	biological_process	0.509	1	1
GO:0048512	circadian behavior	biological_process	0.509	1	1
GO:0005956	protein kinase CK2 complex	cellular_component	0.51059	1	2
GO:0008409	5'-3' exonuclease activity	molecular_function	0.51169	1	3
GO:0016882	cyclo-ligase activity	molecular_function	0.51289	1	1
GO:0030272	5-formyltetrahydrofolate cyclo-ligase activity	molecular_function	0.51289	1	1
GO:0004590	orotidine-5'-phosphate decarboxylase activity	molecular_function	0.51395	1	1
GO:0006207	'de novo' pyrimidine nucleobase biosynthetic process	biological_process	0.51395	1	1
GO:0051641	cellular localization	biological_process	0.51606	1	290
GO:0004383	guanylate cyclase activity	molecular_function	0.51623	1	1
GO:0006182	cGMP biosynthetic process	biological_process	0.51623	1	1
GO:0046068	cGMP metabolic process	biological_process	0.51623	1	1
GO:0009424	bacterial-type flagellum hook	cellular_component	0.51704	1	3
GO:0008063	Toll signaling pathway	biological_process	0.51714	1	1
GO:0005026	transforming growth factor beta receptor activity, type II	molecular_function	0.51769	1	1
GO:0009123	nucleoside monophosphate metabolic process	biological_process	0.51812	1	11
GO:0009976	tocopherol cyclase activity	molecular_function	0.51862	1	1
GO:0005247	voltage-gated chloride channel activity	molecular_function	0.51862	1	4
GO:0005253	anion channel activity	molecular_function	0.51862	1	4
GO:0005254	chloride channel activity	molecular_function	0.51862	1	4
GO:0006821	chloride transport	biological_process	0.51862	1	4
GO:0008308	voltage-gated anion channel activity	molecular_function	0.51862	1	4
GO:0015108	chloride transmembrane transporter activity	molecular_function	0.51862	1	4
GO:0043605	cellular amide catabolic process	biological_process	0.51929	1	2
GO:0043241	protein complex disassembly	biological_process	0.51951	1	9
GO:0009273	peptidoglycan-based cell wall biogenesis	biological_process	0.51985	1	1
GO:0052636	arabinosyltransferase activity	molecular_function	0.51985	1	1
GO:0071766	Actinobacterium-type cell wall biogenesis	biological_process	0.51985	1	1
GO:0005149	interleukin-1 receptor binding	molecular_function	0.51986	1	2
GO:0019855	calcium channel inhibitor activity	molecular_function	0.52004	1	6
GO:0045095	keratin filament	cellular_component	0.52123	1	2
GO:0031324	negative regulation of cellular metabolic process	biological_process	0.52202	1	14
GO:0008705	methionine synthase activity	molecular_function	0.52278	1	2
GO:0042084	5-methyltetrahydrofolate-dependent methyltransferase activity	molecular_function	0.52278	1	2
GO:0042173	regulation of sporulation resulting in formation of a cellular spore	biological_process	0.52293	1	1
GO:0043937	regulation of sporulation	biological_process	0.52293	1	1
GO:0043938	positive regulation of sporulation	biological_process	0.52293	1	1
GO:0045597	positive regulation of cell differentiation	biological_process	0.52293	1	1
GO:0045881	positive regulation of sporulation resulting in formation of a cellular spore	biological_process	0.52293	1	1
GO:0051094	positive regulation of developmental process	biological_process	0.52293	1	1
GO:0003724	RNA helicase activity	molecular_function	0.52337	1	59
GO:0071941	nitrogen cycle metabolic process	biological_process	0.52368	1	4
GO:0008064	regulation of actin polymerization or depolymerization	biological_process	0.52372	1	3
GO:0008154	actin polymerization or depolymerization	biological_process	0.52372	1	3
GO:0030041	actin filament polymerization	biological_process	0.52372	1	3
GO:0030832	regulation of actin filament length	biological_process	0.52372	1	3
GO:0030833	regulation of actin filament polymerization	biological_process	0.52372	1	3
GO:0032271	regulation of protein polymerization	biological_process	0.52372	1	3
GO:0032535	regulation of cellular component size	biological_process	0.52372	1	3
GO:0032956	regulation of actin cytoskeleton organization	biological_process	0.52372	1	3
GO:0032970	regulation of actin filament-based process	biological_process	0.52372	1	3
GO:0043254	regulation of protein complex assembly	biological_process	0.52372	1	3
GO:0000155	phosphorelay sensor kinase activity	molecular_function	0.5242	1	18
GO:0019748	secondary metabolic process	biological_process	0.52438	1	12
GO:0000003	reproduction	biological_process	0.5255	1	86
GO:0051338	regulation of transferase activity	biological_process	0.52551	1	3
GO:0004455	ketol-acid reductoisomerase activity	molecular_function	0.52698	1	9
GO:0022414	reproductive process	biological_process	0.52737	1	39
GO:0004488	methylenetetrahydrofolate dehydrogenase (NADP+) activity	molecular_function	0.52745	1	6
GO:0009200	deoxyribonucleoside triphosphate metabolic process	biological_process	0.52907	1	2
GO:0009211	pyrimidine deoxyribonucleoside triphosphate metabolic process	biological_process	0.52907	1	2
GO:0046080	dUTP metabolic process	biological_process	0.52907	1	2
GO:0010383	cell wall polysaccharide metabolic process	biological_process	0.52945	1	1
GO:0010410	hemicellulose metabolic process	biological_process	0.52945	1	1
GO:0045491	xylan metabolic process	biological_process	0.52945	1	1
GO:0045493	xylan catabolic process	biological_process	0.52945	1	1
GO:0046559	alpha-glucuronidase activity	molecular_function	0.52945	1	1
GO:0000255	allantoin metabolic process	biological_process	0.52972	1	1
GO:0000256	allantoin catabolic process	biological_process	0.52972	1	1
GO:0004848	ureidoglycolate hydrolase activity	molecular_function	0.52972	1	1
GO:0008880	glucuronate isomerase activity	molecular_function	0.52981	1	1
GO:0016849	phosphorus-oxygen lyase activity	molecular_function	0.53048	1	4
GO:0043462	regulation of ATPase activity	biological_process	0.53071	1	1
GO:0019359	nicotinamide nucleotide biosynthetic process	biological_process	0.53214	1	7
GO:0019363	pyridine nucleotide biosynthetic process	biological_process	0.53214	1	7
GO:0072525	pyridine-containing compound biosynthetic process	biological_process	0.53214	1	7
GO:0008544	epidermis development	biological_process	0.53275	1	2
GO:0043588	skin development	biological_process	0.53275	1	2
GO:0015291	secondary active transmembrane transporter activity	molecular_function	0.53298	1	55
GO:0004379	glycylpeptide N-tetradecanoyltransferase activity	molecular_function	0.53384	1	2
GO:0019107	myristoyltransferase activity	molecular_function	0.53384	1	2
GO:0031412	gas vesicle organization	biological_process	0.53446	1	2
GO:0008641	small protein activating enzyme activity	molecular_function	0.53452	1	2
GO:0003824	catalytic activity	molecular_function	0.53478	1	3335
GO:0004525	ribonuclease III activity	molecular_function	0.53502	1	10
GO:0016756	glutathione gamma-glutamylcysteinyltransferase activity	molecular_function	0.53601	1	2
GO:0046937	phytochelatin metabolic process	biological_process	0.53601	1	2
GO:0046938	phytochelatin biosynthetic process	biological_process	0.53601	1	2
GO:0009341	beta-galactosidase complex	cellular_component	0.53719	1	10
GO:0008198	ferrous iron binding	molecular_function	0.53818	1	1
GO:0031160	spore wall	cellular_component	0.53821	1	1
GO:0006525	arginine metabolic process	biological_process	0.53878	1	2
GO:0003006	developmental process involved in reproduction	biological_process	0.53933	1	7
GO:0044782	cilium organization	biological_process	0.53977	1	2
GO:0006595	polyamine metabolic process	biological_process	0.53982	1	3
GO:0006596	polyamine biosynthetic process	biological_process	0.53982	1	3
GO:0006621	protein retention in ER lumen	biological_process	0.54008	1	4
GO:0035437	maintenance of protein localization in endoplasmic reticulum	biological_process	0.54008	1	4
GO:0046923	ER retention sequence binding	molecular_function	0.54008	1	4
GO:0072595	maintenance of protein localization in organelle	biological_process	0.54008	1	4
GO:0019645	anaerobic electron transport chain	biological_process	0.54049	1	1
GO:0005415	nucleoside:sodium symporter activity	molecular_function	0.54084	1	1
GO:0003911	DNA ligase (NAD+) activity	molecular_function	0.54206	1	2
GO:0004615	phosphomannomutase activity	molecular_function	0.54271	1	2
GO:0019307	mannose biosynthetic process	biological_process	0.54271	1	2
GO:0030255	protein secretion by the type IV secretion system	biological_process	0.54289	1	1
GO:0044097	secretion by the type IV secretion system	biological_process	0.54289	1	1
GO:0006071	glycerol metabolic process	biological_process	0.54383	1	5
GO:0019400	alditol metabolic process	biological_process	0.54383	1	5
GO:0043623	cellular protein complex assembly	biological_process	0.54461	1	48
GO:0043412	macromolecule modification	biological_process	0.54521	1	585
GO:0010942	positive regulation of cell death	biological_process	0.54546	1	2
GO:0043065	positive regulation of apoptotic process	biological_process	0.54546	1	2
GO:0043068	positive regulation of programmed cell death	biological_process	0.54546	1	2
GO:0006886	intracellular protein transport	biological_process	0.5468	1	204
GO:0016775	phosphotransferase activity, nitrogenous group as acceptor	molecular_function	0.54697	1	22
GO:0015931	nucleobase-containing compound transport	biological_process	0.54714	1	8
GO:0007093	mitotic cell cycle checkpoint	biological_process	0.54715	1	2
GO:0007094	mitotic spindle assembly checkpoint	biological_process	0.54715	1	2
GO:0010639	negative regulation of organelle organization	biological_process	0.54715	1	2
GO:0031577	spindle checkpoint	biological_process	0.54715	1	2
GO:0045839	negative regulation of mitosis	biological_process	0.54715	1	2
GO:0045841	negative regulation of mitotic metaphase/anaphase transition	biological_process	0.54715	1	2
GO:0051784	negative regulation of nuclear division	biological_process	0.54715	1	2
GO:0071173	spindle assembly checkpoint	biological_process	0.54715	1	2
GO:0071174	mitotic spindle checkpoint	biological_process	0.54715	1	2
GO:1901991	negative regulation of mitotic cell cycle phase transition	biological_process	0.54715	1	2
GO:1902100	negative regulation of metaphase/anaphase transition of cell cycle	biological_process	0.54715	1	2
GO:0070588	calcium ion transmembrane transport	biological_process	0.54716	1	3
GO:0005388	calcium-transporting ATPase activity	molecular_function	0.54725	1	1
GO:0009126	purine nucleoside monophosphate metabolic process	biological_process	0.5495	1	4
GO:0009127	purine nucleoside monophosphate biosynthetic process	biological_process	0.5495	1	4
GO:0009167	purine ribonucleoside monophosphate metabolic process	biological_process	0.5495	1	4
GO:0009168	purine ribonucleoside monophosphate biosynthetic process	biological_process	0.5495	1	4
GO:0004853	uroporphyrinogen decarboxylase activity	molecular_function	0.5499	1	1
GO:0016161	beta-amylase activity	molecular_function	0.55116	1	3
GO:0005681	spliceosomal complex	cellular_component	0.55198	1	14
GO:0006470	protein dephosphorylation	biological_process	0.55241	1	12
GO:0008772	[isocitrate dehydrogenase (NADP+)] kinase activity	molecular_function	0.55327	1	1
GO:0043244	regulation of protein complex disassembly	biological_process	0.55362	1	6
GO:0003756	protein disulfide isomerase activity	molecular_function	0.55418	1	1
GO:0016862	intramolecular oxidoreductase activity, interconverting keto- and enol-groups	molecular_function	0.55418	1	1
GO:0016864	intramolecular oxidoreductase activity, transposing S-S bonds	molecular_function	0.55418	1	1
GO:0046429	4-hydroxy-3-methylbut-2-en-1-yl diphosphate synthase activity	molecular_function	0.5544	1	1
GO:0052592	oxidoreductase activity, acting on CH or CH2 groups, with an iron-sulfur protein as acceptor	molecular_function	0.5544	1	1
GO:0008013	beta-catenin binding	molecular_function	0.55443	1	4
GO:0015662	ATPase activity, coupled to transmembrane movement of ions, phosphorylative mechanism	molecular_function	0.5547	1	2
GO:0034508	centromere complex assembly	biological_process	0.55555	1	9
GO:0006013	mannose metabolic process	biological_process	0.55565	1	3
GO:0004127	cytidylate kinase activity	molecular_function	0.55613	1	1
GO:0005179	hormone activity	molecular_function	0.55626	1	30
GO:0003917	DNA topoisomerase type I activity	molecular_function	0.55807	1	1
GO:0090066	regulation of anatomical structure size	biological_process	0.55962	1	5
GO:0015079	potassium ion transmembrane transporter activity	molecular_function	0.56056	1	16
GO:0019013	viral nucleocapsid	cellular_component	0.5611	1	7
GO:0006612	protein targeting to membrane	biological_process	0.56134	1	24
GO:0006613	cotranslational protein targeting to membrane	biological_process	0.56134	1	24
GO:0019299	rhamnose metabolic process	biological_process	0.5622	1	1
GO:0016055	Wnt receptor signaling pathway	biological_process	0.56252	1	8
GO:0005664	nuclear origin of replication recognition complex	cellular_component	0.56259	1	3
GO:0042302	structural constituent of cuticle	molecular_function	0.56259	1	3
GO:0000184	nuclear-transcribed mRNA catabolic process, nonsense-mediated decay	biological_process	0.56267	1	3
GO:0000956	nuclear-transcribed mRNA catabolic process	biological_process	0.56267	1	3
GO:0004609	phosphatidylserine decarboxylase activity	molecular_function	0.56299	1	1
GO:0050151	oleate hydratase activity	molecular_function	0.56356	1	1
GO:0051715	cytolysis in other organism	biological_process	0.56403	1	3
GO:0006367	transcription initiation from RNA polymerase II promoter	biological_process	0.56404	1	9
GO:0006399	tRNA metabolic process	biological_process	0.56435	1	132
GO:0016702	oxidoreductase activity, acting on single donors with incorporation of molecular oxygen, incorporation of two atoms of oxygen	molecular_function	0.56464	1	18
GO:0043015	gamma-tubulin binding	molecular_function	0.56533	1	1
GO:0060341	regulation of cellular localization	biological_process	0.56577	1	3
GO:0042157	lipoprotein metabolic process	biological_process	0.56624	1	22
GO:0022900	electron transport chain	biological_process	0.56659	1	36
GO:0008218	bioluminescence	biological_process	0.56691	1	2
GO:0006904	vesicle docking involved in exocytosis	biological_process	0.56745	1	6
GO:0070085	glycosylation	biological_process	0.56781	1	51
GO:0009291	unidirectional conjugation	biological_process	0.56842	1	1
GO:0031226	intrinsic to plasma membrane	cellular_component	0.56877	1	4
GO:0009719	response to endogenous stimulus	biological_process	0.5688	1	16
GO:0009725	response to hormone stimulus	biological_process	0.5688	1	16
GO:0009245	lipid A biosynthetic process	biological_process	0.56883	1	3
GO:0046493	lipid A metabolic process	biological_process	0.56883	1	3
GO:1901269	lipooligosaccharide metabolic process	biological_process	0.56883	1	3
GO:1901271	lipooligosaccharide biosynthetic process	biological_process	0.56883	1	3
GO:0009237	siderophore metabolic process	biological_process	0.56921	1	1
GO:0015343	siderophore transmembrane transporter activity	molecular_function	0.56921	1	1
GO:0015603	iron chelate transmembrane transporter activity	molecular_function	0.56921	1	1
GO:0019290	siderophore biosynthetic process	biological_process	0.56921	1	1
GO:0042927	siderophore transporter activity	molecular_function	0.56921	1	1
GO:0008060	ARF GTPase activator activity	molecular_function	0.56945	1	8
GO:0032312	regulation of ARF GTPase activity	biological_process	0.56945	1	8
GO:0006206	pyrimidine nucleobase metabolic process	biological_process	0.57017	1	1
GO:0019856	pyrimidine nucleobase biosynthetic process	biological_process	0.57017	1	1
GO:0007218	neuropeptide signaling pathway	biological_process	0.57097	1	7
GO:0009399	nitrogen fixation	biological_process	0.57172	1	2
GO:0004371	glycerone kinase activity	molecular_function	0.57225	1	1
GO:0006403	RNA localization	biological_process	0.5725	1	7
GO:0050657	nucleic acid transport	biological_process	0.5725	1	7
GO:0050658	RNA transport	biological_process	0.5725	1	7
GO:0051236	establishment of RNA localization	biological_process	0.5725	1	7
GO:0006948	induction by virus of host cell-cell fusion	biological_process	0.57307	1	1
[truncated: 1,350 more rows]
