# Supplementary material for: Comprehensive RNA-Seq Analysis on the Regulation of Tomato Ripening by Exogenous Auxin
Source: PLoS One. 2016 May 26;11(5):e0156453. doi: 10.1371/journal.pone.0156453 (PMC4881990; doi:10.1371/journal.pone.0156453)
Supplement: S10 Table — (XLSX) [file pone.0156453.s012.xlsx]

## Sheet: S10 Table
S10 Tables. Node strengths of the correlation networks.
Gene id	Gene name	Node strength
Solyc08g008110	ACS6	0.507567
Solyc08g008100	SlACS6	0.462212
Solyc05g050010	SlACS4	0.595542
Solyc01g095080	SlACS2	0.681949
Solyc07g049530	SlACO1	0.58974
Solyc09g089580	SlACO3	0.692768
Solyc06g053710	SlETR4	0.672344
Solyc09g075440	SlNR	0.686664
Solyc07g008250	SlEBF	0.224983
Solyc12g009560	SlEBF1	0.63255
Solyc04g051360	SlERFd1	0.343572
Solyc01g065980	SlERFe4	0.532938
Solyc06g082590	SlERFe3	0.429081
Solyc10g050970	SlERFd4	0.297098
Solyc12g056590	SlERFd2	0.572368
Solyc03g123500	SlERFc4	0.57934
Solyc09g066360	SlERFc3	0.327008
Solyc04g014530	SlERFc2	0.580997
Solyc03g093610	SlERFa2	0.267707
Solyc05g051200	SlERFb3	0.447178
Solyc06g065630	SlFYZ	0.651025
Solyc06g008050	SlFYZ4	0.542715
Solyc09g074520	SlAFB5	0.605343
Solyc03g118290	SlARF2a	0.651982
Solyc04g081240	SlARF5	0.541796
Solyc07g016180	SlARF7a	0.64151
Solyc02g037530	SlARF8b	0.627614
Solyc01g096070	SlARF18	0.596189
Solyc05g056040	SlARF24	0.60437
Solyc06g053830	SlIAA7	0.386326
Solyc03g120500	SlIAA6	0.576828
Solyc03g120390	SlIAA8	0.677985
Solyc06g066020	SlIAA4	0.555062
Solyc09g008170	SlSAUR69	0.641541
Solyc07g014620	SlSAUR63	0.655047
Solyc06g072650	SlSAUR61	0.63039
Solyc04g081270	SlSAUR52	0.641667
Solyc04g081250	SlSAUR51	0.490912
Solyc03g082530	SlSAUR37	0.422466
Solyc03g082520	SlSAUR36	0.329156
Solyc01g110560	SlSAUR3	0.482523
Solyc01g096340	SlSAUR2	0.627266
Solyc01g110680	SlSAUR12	0.565156
Solyc01g107400	SlGH3.8	0.325128
Solyc02g084010	SlSAUR33	0.569809
